# Deleterious mutation accumulation in *Arabidopsis thaliana* pollen genes: a role for a recent relaxation of selection

---

MC HARRISON, EB MALLON, D TWELL, RL HAMMOND

Department of Genetics and Genome Biology

University of Leicester

University Road

Leicester, LE1 7RH

Phone: ++ (0)116 252 3339

Fax: +44 (0)116 252 3330

E-mail: [m.harrison@uni-muenster.de](mailto:m.harrison@uni-muenster.de) or [rh225@le.ac.uk](mailto:rh225@le.ac.uk)

**Keywords:** Purifying selection, sporophyte, pollen, ploidy, deleterious, masking

Running title: "Relaxed selection on pollen-specific genes."

## Abstract

In many studies sex related genes have been found to evolve rapidly. We therefore expect plant pollen genes to evolve faster than sporophytic genes. In addition, pollen genes are expressed as haploids which can itself facilitate rapid evolution because recessive advantageous and deleterious alleles are not masked by dominant alleles. However, this mechanism is less straightforward to apply in the model plant species *Arabidopsis thaliana*. For 1 million years *A.thaliana* has been self-compatible, a life history switch that has caused: a reduction in pollen competition, increased homozygosity and a dilution of masking in diploid expressed, sporophytic genes. In this study we have investigated the relative strength of selection on pollen genes compared to sporophytic genes in *A. thaliana*. We present two major findings: 1) before becoming self-compatible positive selection was stronger on pollen genes than sporophytic genes for *A. thaliana*; 2) current polymorphism data indicate selection is weaker on pollen genes compared to sporophytic genes. These results indicate that since *A. thaliana* has become self-compatible, selection on pollen genes has become more relaxed. This has led to higher polymorphism levels and a higher build-up of deleterious mutations in pollen genes compared to sporophytic genes.

## 1 Introduction

2 A faster evolution of reproductive genes compared to somatic genes has been documented for a wide range  
3 of taxa, including primates, rodents, mollusks, insects and fungi (Turner and Hoekstra, 2008; Swanson  
4 and Vacquier, 2002). The faster evolution is often observable in a higher number of non-synonymous  
5 nucleotide substitutions (base changes which alter the amino acid sequence of a protein) within the  
6 coding regions of orthologues. In most cases stronger positive selection is described as the mechanism  
7 driving the divergence of these genes, generally due to some form of sexual selection like cryptic female  
8 choice or sperm competition.

9 Two studies on the strength of selection on reproductive and non-reproductive genes in *Arabidopsis*  
10 *thaliana* presented somewhat conflicting findings (Szövényi *et al.*, 2013; Gossmann *et al.*, 2013). Szövényi  
11 *et al.* (2013) showed that the rate of protein evolution, measured in terms of dN/dS (ratio of non-  
12 synonymous to synonymous per site substitution rates), between *Arabidopsis thaliana* and *A. lyrata* of  
13 pollen-specific genes was significantly higher than for sporophyte-specific genes (Szövényi *et al.*, 2013).  
14 The detection of higher intra-specific polymorphism levels within pollen genes was compatible with re-  
15 laxed purifying selection on pollen genes. This is because stronger positive selection, that could have  
16 caused the higher divergence rates, would have reduced intra-specific polymorphism levels. High tissue  
17 specificity and higher expression noise compared to sporophytic genes were considered the likely causes  
18 of relaxed selection on pollen genes. As pointed out in a further study, which focused on the comparison  
19 of genes with male biased or female biased expression (Gossmann *et al.*, 2013), inter-specific divergence  
20 and currently existing intra-specific polymorphisms likely arose under different selection regimes for *A.*  
21 *thaliana*. The divergence of *A. thaliana* from its closest relative *A. lyrata* happened largely during a pe-  
22 riod of outcrossing, since speciation occurred approximately 13 million years ago (Beilstein *et al.*, 2010),  
23 whereas *A. thaliana* became self-compatible only roughly one million years ago (Tang *et al.*, 2007). Di-  
24 vergence patterns for *A. thaliana* should therefore be similar to outcrossing species and reveal stronger  
25 selection on pollen genes. Existing, intra-specific polymorphisms, on the other hand, are expected to be  
26 influenced by high selfing rates in *A. thaliana* populations that have led to high levels of homozygosity  
27 across the whole genome (Nordborg, 2000; Wright *et al.*, 2008; Platt *et al.*, 2010). The outcome is a  
28 reduction in the masking of deleterious alleles in diploid sporophyte stages (because of high homozy-  
29 gosity) compared to the haploid gametophyte stage. Furthermore, selfing will result in fewer genotypes  
30 competing for fertilization so lowering the magnitude of pollen competition and reducing the strength of  
31 selection acting on pollen (Charlesworth and Charlesworth, 1992).

32 Gossmann *et al.* (2013) found protein divergence (dN/dS) to be higher for female biased genes com-  
33 pared to both male genes and 476 random, non-reproductive genes sampled from the *A. thaliana* genome.  
34 However, pollen genes did not differ from the non-reproductive genes in terms of dN/dS. Despite using a

35 larger number of accessions to measure polymorphism than in the Szövényi *et al.* study (80 compared to  
36 19), Gossmann *et al.* did not detect any difference in nucleotide diversity between the non-reproductive  
37 genes and pollen-specific genes in general, although nucleotide diversity was significantly lower for sperm  
38 cell-specific genes (Gossmann *et al.*, 2013). When comparing polymorphism to divergence data with a  
39 modified version of the McDonald-Kreitman test (McDonald and Kreitman 1991, Distribution of Fitness  
40 Effects Software, DoFE; Eyre-Walker and Keightley 2009) a higher proportion of non-synonymous sites  
41 were found to be under purifying and adaptive selection for pollen genes compared to both female biased  
42 and non-reproductive genes.

43 The aim of our study was to attempt to resolve these apparently conflicting results for *A. thaliana* and  
44 to address the following questions. Are pollen proteins really more divergent than sporophyte proteins?  
45 If so, is this due to more relaxed purifying selection or increased positive selection on pollen genes?  
46 Have patterns of selection changed for *A. thaliana* since it became self-compatible? In a first step we  
47 estimated the protein divergence of 1,552 pollen and 5,494 sporophytic genes to both *A. lyrata* and  
48 *Capsella rubella* in terms of interspecific dN/dS. This larger gene set, combined with a larger number of  
49 accessions than both previous studies (269 compared to 80 and 19), increased the power to detect sites  
50 under positive and negative selection within the two groups of genes when conducting a DoFE analysis.  
51 As the polymorphism and divergence data likely reflect periods of differing selection regimes (divergence  
52 under self incompatibility, polymorphism under self compatibility) we additionally detected sites under  
53 positive selection using a site model of the Phylogenetic Analysis by Maximum Likelihood software (PAML  
54 4.6; Yang 2007), which does not require polymorphism data and detects sites under positive selection  
55 by allowing dN/dS to vary within genes. In a second step, to investigate more recent selection patterns,  
56 we analyzed intra-specific polymorphism levels within each group of genes. Lower diversity, measured  
57 here via non-synonymous Watterson's  $\theta$  and nucleotide diversity ( $\pi$ ), would be expected for pollen genes  
58 compared to sporophyte genes in the case of stronger selection (Nielsen, 2005). In a further test we also  
59 compared existing levels of putative deleterious alleles (premature stop codons and frameshift mutations)  
60 between pollen genes and sporophyte genes. In each of these analyses we controlled for differences in  
61 genomic factors (expression level, GC content, codon bias, gene density, gene length and average intron  
62 length) between the pollen and sporophyte-specific genes which were correlated with the divergence,  
63 polymorphism and deleterious allele measurements.

## 64 **Materials and Methods**

### 65 *Genomic data*

66 Publicly available variation data were obtained for 269 inbred strains of *A. thaliana*. Beside the reference  
67 genome of the Columbia strain (Col-0), which was released in 2000 (*Arabidopsis*, Genome Initiative),

250 were obtained from the 1001 genomes data center (<http://1001genomes.org/datacenter/>; accessed  
September 2013), 170 of which were sequenced by the Salk Institute (Schmitz *et al.*, 2013) and 80 at the  
Max Planck Institute, Tübingen (Cao *et al.*, 2011). A further 18 were downloaded from the 19 genomes  
project (<http://mus.well.ox.ac.uk/>; accessed September 2013; Gan *et al.* 2011). These 269 files contained  
information on SNPs and indels recorded for separate inbred strains compared to the reference genome.  
A quality filter was applied to all files, in order to retain only SNPs and indels with a phred score of  
at least 25. For further analyses, gene sequences were created for each of these strains based on coding  
sequence information contained in the TAIR10 gff3 file.

### *Expression data*

Normalized microarray data, covering 20,839 genes specific to different developmental stages and tissues  
of *A. thaliana* (table 10), were obtained from Borg *et al.* (2011). The expression data consisted of 7 pollen  
and 10 sporophyte data sets (table 10). Four of the pollen data sets represented expression patterns of the  
pollen developmental stages, uninucleate, bicellular, tricellular and mature pollen grain, one contained  
expression data of sperm cells and the remaining two were pollen tube data sets. There was a strong,  
significant correlation between the two pollen tube data sets ( $\rho = 0.976$ ;  $p < 2.2 \times 10^{-16}$ ; Spearman's  
rank correlation), so both were combined and the highest expression value of the two sets was used for  
each gene. Each of the 10 sporophyte data sets contained expression data for specific sporophytic tissues  
(table 10).

Each expression data point consisted of a normalized expression level (ranging from 0 to around  
20,000, scalable and linear across all data points and data sets) and a presence score ranging from 0 to 1  
based on its reliability of detection across repeats, as calculated by the MAS5.0 algorithm (Borg *et al.*,  
2011). In our analyses expression levels were conservatively considered as present if they had a presence  
score of at least 0.9, while all other values were regarded as zero expression.

Genes were classed as either pollen or sporophyte-specific genes, if expression was reliably detectable  
in only pollen or only sporophyte tissues or developmental stages. The highest expression value across all  
tissues or developmental stages was used to define the expression level of a particular gene. The highest  
value was used since this best represents the genes' most important effect on the phenotype. We also  
consider tissue specificity of expression to fully explain a gene's expression profile.

### *Detecting signatures of selection*

#### **Evolutionary Rates**

To estimate evolutionary rates of genes, dN/dS ratios (ratio of non-synonymous to synonymous substitu-  
tion rates relative to the number of corresponding non-synonymous and synonymous sites) were calculated  
for all orthologous genes between pairs of the three species *A. thaliana*, *A. lyrata* and *Capsella rubella*

101 using the codeml program within the PAML package (Yang, 2007). The protocol described in Szövényi  
102 *et al.* (2013) was followed. Orthologues were found by performing reciprocal blastp searches (Altschul  
103 *et al.*, 1997) between proteomes and retaining protein pairs with mutual best hits showing at least 30%  
104 identity along 150 aligned amino acids (Rost, 1999). Orthologous protein sequences were aligned with  
105 MUSCLE (Edgar, 2004) at default settings and mRNA alignments were performed based on these protein  
106 alignments with pal2nal (Suyama *et al.*, 2006). The codeml program was run with runmode -2, model 2  
107 and 'NSsites' set to 0. In most results we report divergence (dN/dS) between *A. thaliana* and *A. lyrata*  
108 unless otherwise stated.

109 In order to detect genes that contain codon sites under positive selection, we performed a likelihood-  
110 ratio test (LRT) between models 7 (null hypothesis; dN/dS limited between 0 and 1) and 8 (alternative  
111 hypothesis; additional parameter allows dN/dS > 1) by using runmode 0, model 0 and setting 'NSsites'  
112 to 7 & 8. An LRT statistic (twice the difference in log-likelihood between the two models) greater than  
113 9.210 indicated a highly significant difference ( $p < 0.01$ ; LRT > 5.991:  $p < 0.05$ ) between the two models  
114 suggesting the existence of sites under positive selection within the tested gene (Anisimova *et al.*, 2003;  
115 Yang, 2007). These tests were carried out on multi-species alignments containing orthologues from *A.*  
116 *thaliana*, *A. lyrata* and *C. rubella* that were contained in each of the three orthologue lists described  
117 before. Alignments were carried out in the same manner as described above for pairs of sequences.

118 Levels of purifying and positive selection were estimated with the Distribution of Fitness Effects  
119 Software (DoFE 3.0) using the Eyre-Walker and Keightley (2009) method. For the input files synonymous  
120 and non-synonymous site spectra were obtained using the Pegas package (Paradis, 2010) in R (version  
121 3.2.0; R Core Team 2012). Four-fold sites were used to represent synonymous positions and zero-fold  
122 degenerate sites to represent nonsynonymous positions. Four-fold and zero-fold sites were calculated with  
123 perl scripts; any codons containing more than one SNP were removed from the analysis. We randomly  
124 sampled 20 alleles at each site without replacement using the perl module 'shuffle'. Ten analyses were  
125 carried out for each gene group, each time randomly sampling 50 genes without replacement. Values  
126 were summed across all genes. The results were checked for convergence as advised in the user manual  
127 and repeated with new samples if any overall trends were observed. The results of all 10 samples were  
128 combined and presented in this study.

### 129 **Intra-specific polymorphism**

130 Nucleotide diversity ( $\pi$ ) and Watterson's  $\theta$  were calculated for non-synonymous sites using the R package  
131 PopGenome (version 2.1.6; Pfeifer *et al.* 2014). The diversity.stats() command was implemented and the  
132 subsites option was set to "nonsyn". Both values were subsequently divided by the number of sites.

### 133 Putatively deleterious alleles

134 To quantify the frequency of deleterious mutations for each gene, the occurrence of premature stop  
135 codons and frameshifts was calculated for each gene locus across all 268 strains compared to the reference  
136 genome. Stop codons were recorded as the number of unique alternative alleles occurring within the 269  
137 strains as a result of a premature stop codon. Frameshifts were calculated as a proportion of the strains  
138 containing a frameshift mutation for a particular gene. All analyses of coding regions were based on the  
139 representative splice models of the *A. thaliana* genes (TAIR10 genome release, [www.arabidopsis.org](http://www.arabidopsis.org)).

### 140 Statistical analyses

141 All analyses were performed in R (version 3.2.0; R Core Team 2012). To measure statistical difference  
142 between groups we utilized the non-parametric Mann Whitney U test (`wilcox.test()` function). In case of  
143 multiple testing, all p-values were corrected with the Bonferroni method using the function `p.adjust()`.  
144 For correlations either the Spearman rank test (`rcorr()` function of Hmisc package; version 3.16-0; Jr and  
145 others 2015) or Spearman rank partial correlation (`pcor.test()` function; `ppcor` package; version 1.0; Kim  
146 2012) was carried out.

147 Six genomic parameters were investigated as possible predictors of dN/dS, polymorphism levels and  
148 frequency of deleterious mutations. These were expression level, GC-content, codon bias variance, gene  
149 density, average gene length and average intron length. Expression level is described above in the sec-  
150 tion "Expression data". Average gene length and average intron length were calculated using custom  
151 made scripts which extracted information from the genomic gff file. GC content was calculated with  
152 a downloaded Perl script, which was originally written by Dr. Xiaodong Bai ([http://www.oardc.ohio-  
153 state.edu/tomato/HCS806/GC-script.txt](http://www.oardc.ohio-state.edu/tomato/HCS806/GC-script.txt)). RSCU (relative synonymous codon usage) was used to mea-  
154 sure codon bias. It was calculated for each codon of each locus with the R package 'seqinr' (`uco()` function;  
155 version 3.1-3; Perriere 2014). As the mean value per gene varied very little between loci but varied by  
156 site within genes, we used RSCU variance as a measure for codon bias. Gene density was calculated  
157 with custom Perl and R scripts by counting the number of genes within each block of 100kb along each  
158 chromosome. Gene densities were then attributed to each gene depending on the 100kb window, in which  
159 they were situated.

160 As most of the genomic parameters investigated here (gene expression, GC-content, codon bias vari-  
161 ance, gene density, average gene length and average intron length) generally differed between groups of  
162 genes (see Results), it was important to control for their possible influence on divergence, polymorphism  
163 and frequencies of deleterious mutations. The 6 parameters were also inter-correlated, so we decided to  
164 implement principle component regression analyses (`pcr()` command, `pls` package, version 2.4-3; Mevik  
165 and Wehrens 2007) in order to combine these parameters into independent predictors of the variation in  
166 the investigated dependent variable (e.g. dN/dS) as described by Drummond *et al.* (2006). All variables,  
167 including the dependent variable, were log transformed (0.0001 was added to gene length and average

168 intron length due to zero values). A jack knife test (`jack.test()`) was subsequently performed on each  
169 set of principal component regression results to test if the contribution of each predictor was significant.  
170 Non-significant predictors were then removed and the analyses were repeated. The principle component  
171 (PC), which explained the highest amount of variation in the dependent variable, was then used to rep-  
172 resent the genomic predictors in an ANCOVA (e.g.  $\text{lm}(\log(\text{dN}/\text{dS}) \sim \text{PC1} * \text{ploidy})$ ) with life-stage as  
173 the binary co-variate.

## 174 Results

### 175 *Life-stage limited genes*

176 Within the total data set, containing 20,839 genes, 4,304 (20.7%) had no reliably detectable expression  
177 (score < 0.9; see methods) in any of the analysed tissues and were removed from the analysis. Of the  
178 remaining 16,535 genes, 1,552 genes (9.4%) were expressed only in pollen and a further 5,494 (33.2%)  
179 were limited to sporophytic tissues (referred to as pollen-specific genes and sporophyte-specific genes in  
180 this study). The pollen-specific and sporophyte-specific genes were randomly distributed among the five  
181 chromosomes (table 1), and their distributions within the chromosomes did not differ significantly from  
182 each other (table 2).

183 Expression level was roughly twice as high within pollen-specific genes (median: 1,236.1) compared  
184 to sporophyte-specific genes (median: 654.7;  $W = 5.5 \times 10^6$ ;  $p = 1.2 \times 10^{-63}$ ; table 3). GC-content  
185 was significantly higher within sporophyte-specific genes (median: 44.6%) than in pollen-specific genes  
186 (median: 43.8%;  $W = 3.4 \times 10^6$ ;  $p = 1.0 \times 10^{-19}$ ; table 3). Sporophyte-specific genes were significantly  
187 longer and contained significantly longer introns than pollen-specific genes (table 3). Gene density was  
188 slightly but significantly higher in pollen-specific genes; codon bias variance did not differ significantly  
189 (table 3).

### 190 *Pollen-specific proteins evolve at a faster rate than sporophyte-specific proteins*

191 The rate of evolution of *Arabidopsis thaliana* proteins from *Arabidopsis lyrata* orthologues was estimated  
192 using interspecific dN/dS. Of the 13,518 genes for which 1-to-1 orthology could be detected and dN/dS  
193 could be reliably analysed, 1144 genes were pollen-specific and 4395 were sporophyte-specific. Protein  
194 divergence was significantly higher for pollen-specific genes than sporophyte-specific genes ( $p = 4.3 \times$   
195  $10^{-24}$ ; table 6, fig. 1(c)). This was mainly due to a significant difference in the non-synonymous sub-  
196 stitution rate for which the median was 30.8% higher in pollen specific genes (dN;  $p = 2.4 \times 10^{-27}$ ; fig.  
197 1(a)). Synonymous divergence (dS) was only 3.7% higher in pollen-specific genes and the difference was  
198 less significant ( $p = 1.6 \times 10^{-4}$ ; fig. 1(b)).

199 Both expression level ( $\rho = -0.232$ ;  $p = 5.6 \times 10^{-169}$ ) and GC-content ( $\rho = -0.145$ ;  $p = 4.3 \times 10^{-64}$ ) were



200 significantly negatively correlated with dN/dS while controlling for other factors (codon bias variance,  
201 gene length, average intron length and gene density; table 4). Codon bias variance and gene length  
202 correlated weakly and negatively with dN/dS, while average intron length and gene density showed  
203 minimal correlation (table 4).

204 In order to determine how the life-stage (pollen or sporophytic tissue), to which the expression of a  
205 gene is limited, may be contributing to the measured difference in dN/dS, it was important to control  
206 for the six previously mentioned genomic variables (expression level, GC-content, codon bias variance,  
207 gene length, average intron length and gene density). This was important since five of the six genomic  
208 variables differed significantly between pollen and sporophyte-specific genes (table 3) and all six were  
209 significantly correlated to dN/dS (table 4). A principal component regression was conducted to allow  
210 us to condense these predictors of dN/dS into independent variables. We first included all 6 predictors  
211 in the principal component regression model, and they explained 9.10% of dN/dS variation. Principal  
212 component (PC) 2 explained the largest amount of variation at 6.15%. A jack knife test on this PC  
213 revealed significant p-values ( $< 0.05$ ) only for expression, GC content and codon bias variance. After  
214 removal of the non-significant predictors (gene length, average intron length and gene density) codon bias  
215 variance was also no longer significant. The first PC of a model containing expression and GC content as  
216 the predictors of dN/dS had an explanation value of 7.15% (total 7.24%). This first PC was used as the  
217 continuous variable in an ANCOVA with dN/dS as the dependent variable and life-stage as the binary  
218 co-variable. The pollen regression line was higher than for the sporophyte genes for the majority of the  
219 PC1 range (fig. 2). As the slopes differed significantly ( $p = 4.4 \times 10^{-4}$ ), we measured the difference in  
220 dN/dS between pollen and sporophyte genes within 5 equal bins along the PC1 axis. In all five quantiles  
221 dN/dS was higher within pollen genes than within sporophyte-specific genes (highly significant in the  
222 first three, marginally significant in the fourth after correction and non-significant in the fifth quantile;  
223 table 5).

#### 224 *Sporophyte-specific genes contain a higher number of sites under purifying selection*

225 We investigated whether the higher divergence of pollen-specific proteins compared to sporophyte-specific  
226 proteins was restricted to *Arabidopsis*, and possibly fueled by selection in either *A. thaliana* or *A. lyrata*,  
227 by investigating the protein divergence of both from *Capsella rubella*. Divergence was significantly higher  
228 for pollen-specific proteins in all three comparisons (table 6). Between branches only one comparison of  
229 divergence values differed significantly for sporophyte-specific proteins: *A. thaliana*-*A. lyrata* dN/dS  $>$   
230 *A. lyrata*-*C. rubella* dN/dS (Bonferroni corrected p-value: 0.046); all other differences between branches  
231 were non-significant.

232 A higher dN/dS value, which is still lower than 1, generally indicates weaker purifying selection (Yang  
233 and Bielawski, 2000). Only 41 out of 13,518 genes had a dN/dS value greater than 1 and 65.1% of genes

234 had a dN/dS less than 0.2. However, gene-wide estimates of dN/dS can be inflated by a few codon sites  
235 under positive selection ( $> 1$ ) even if purifying selection is otherwise prevalent. In order to test whether  
236 the higher dN/dS within pollen genes was being driven by relaxed purifying selection or increased positive  
237 selection we analysed the distribution of fitness effects of new mutations using the DoFE software (DoFE  
238 3.0; Eyre-Walker and Keightley 2009). The analyses were repeated 10 times on random samples of 20  
239 alleles and 50 genes from each group. The distribution of new deleterious mutations showed that a smaller  
240 fraction of non-synonymous mutations were strongly deleterious ( $N_e s > 10$ ;  $N_e$ : effective population size,  
241  $s$ : selection coefficient) within pollen-specific genes (mean 42.9%) compared to sporophyte genes (47.9%;  
242 Fig. 3). Also, a higher proportion of mutations in pollen genes were effectively neutral ( $N_e s < 1$ ; 51.0%)  
243 compared to sporophyte genes (45.7%). This indicates weaker purifying selection within the pollen-  
244 specific genes (Eyre-Walker and Keightley, 2009) and suggests the higher dN/dS rates in pollen genes  
245 may be caused by an accumulation of slightly deleterious mutations due to random drift.

246 Using the same software we were unable to find evidence for positive selection for either group of  
247 genes, since  $\alpha$  (proportion of sites under positive selection) was not significantly greater than zero in any  
248 of 10 random samples (mean: -1.6 in pollen; -1.9 in sporophyte genes). We also calculated  $\alpha$  separately for  
249 each gene via an extension of the McDonald-Kreitman test presented in Smith and Eyre-Walker (2002).  
250 A slightly higher proportion (20.0%) of pollen genes had a positive value for  $\alpha$  compared to 19.3% for  
251 sporophyte genes. A mean  $\alpha$  of -3.5 in pollen genes and -3.9 in sporophyte genes, indicates, however,  
252 the prevalence of purifying selection. We conducted a further analysis to investigate levels of positive  
253 selection, which does not rely on polymorphism data. On a multi-sequence alignment containing single  
254 orthologues from each of the three species, *A. thaliana*, *A. lyrata* and *C. rubella*, we allowed dN/dS to  
255 vary among sites in order to detect sites under positive selection using codeml in PAML (Yang, 2007).  
256 This analysis, suggested a much higher proportion of pollen-specific genes contained sites under positive  
257 selection (15.2% at  $p < 0.05$ ; 9.1 % at  $p < 0.01$ ) compared to sporophyte-specific genes (9.3%  $p < 0.05$ ;  
258 4.8% at  $p < 0.01$ ). As expected, dN/dS was significantly higher within the genes containing sites under  
259 positive selection compared to genes with no evidence for positive selection (median of 0.338 compared  
260 to 0.179 for pollen genes,  $p = 3.8 \times 10^{-21}$ ; 0.228 compared to 0.154 in sporophyte genes,  $3.9 \times 10^{-24}$ ). It  
261 appears, therefore, that at least a part of the difference in dN/dS is caused by a higher rate of adaptive  
262 fixations in pollen genes.

### 263 *Pollen-specific genes are more polymorphic than sporophyte-specific genes*

264 Pollen-specific genes were more polymorphic than sporophyte-specific genes with both non-synonymous  
265 nucleotide diversity ( $\pi_n$ ) and non-synonymous Watterson's theta ( $\theta_n$ ) significantly higher in pollen-  
266 specific genes (fig. 4). Both  $\pi$  and  $\theta$  at synonymous sites did not differ between sporophyte- and  
267 pollen-specific genes ( $p = 0.18$  &  $0.58$ , respectively). Each of the six correlates of dN/dS listed above

268 also correlated significantly with  $\pi_n$  and  $\theta_n$  (all negatively except gene length; table 4). Five of the six  
269 variables (average intron length was not significant) explained 8.57% of variation in  $\pi_n$  in a principal  
270 component regression. The first PC contributed most (3.11%). Four of the six factors (expression level,  
271 GC content, codon bias variance, and gene density) explained a total of 7.76% of the variation in  $\theta_n$   
272 (first PC: 7.38%). For each model the first PC was implemented in an ANCOVA testing the influence  
273 of life-stage as a co-variate.  $\theta_n$  remained significantly higher for pollen-specific genes ( $p = 6.4 \times 10^{-61}$ ;  
274 fig. 5(b)). PC1 had a significantly greater influence on  $\pi_n$  for sporophyte genes (slope: -0.195) than on  
275 pollen genes (slope: -0.109;  $p = 7.2 \times 10^{-4}$ ; Fig. 5(a)). We therefore tested the significance of difference  
276 in  $\pi_n$  within 5 equal bins along the PC1 axis. In the 2nd to the 5th 20% quantiles  $\pi_n$  was significantly  
277 higher within pollen genes, there was no difference in the first quantile (table 7).

### 278 *Higher frequency of deleterious mutations in pollen-specific genes*

279 Higher polymorphism levels may indicate relaxed purifying selection on pollen-specific genes. To test this  
280 hypothesis further we investigated the frequency of putatively deleterious mutations - premature stop  
281 codons and frameshift mutations - within the 269 *A. thaliana* strains. Stop codon frequency, defined here  
282 as the relative number of unique alternative alleles due to premature stop codons occurring within the 269  
283 strains, was significantly higher within pollen-specific genes (mean:  $0.063 \pm 0.004$ ; sporophyte mean:  $0.049$   
284  $\pm 0.002$ ;  $p = 4.1 \times 10^{-15}$ ; Mann Whitney U test; fig. 6). The frequency of strains containing at least one  
285 frameshift mutation was also significantly higher for pollen-specific genes (mean:  $0.021 \pm 0.002$ ) compared  
286 to sporophyte-specific genes (mean:  $0.014 \pm 0.001$ ;  $p = 6.6 \times 10^{-22}$ ; fig. 6). Significant correlations existed  
287 between these measures of deleterious mutations and the six correlates of dN/dS (table 4).

288 In a principal component regression analysis all six predictors (expression level, codon bias variance,  
289 GC content, gene length, average intron length and gene density) were significantly correlated with stop  
290 codon frequency. The six predictors explained a total of 20.04% of the variation in stop codon frequency,  
291 17.42% explained by the first PC. Within an ANCOVA with life-stage as the binary co-variant the  
292 frequency of premature stop codons remained higher within pollen-specific genes for the majority of PC1  
293 (fig. 7(a)). The slopes differed significantly but the frequency of stop codons was significantly higher for  
294 pollen genes within the second to fifth 20% quantiles (table 8).

295 Four of the predictors (expression level, GC content, gene length and gene density) were also signifi-  
296 cantly correlated with the frequency of frameshift mutations. However, the four variables only explained  
297 a total of 5.49% of variation (first PC 5.08%). In an ANCOVA analysis frameshift mutations remained  
298 significantly more frequent within pollen-specific genes when controlling for the predictors via the first  
299 PC (fig. 7(b)).

300 *Tissue specific genes*

301 Tissue specificity has been shown to be negatively correlated with selection efficiency (Duret and Mouchi-  
302 roud, 2000; Liao *et al.*, 2006; Slotte *et al.*, 2011). The on average greater tissue specificity in pollen-specific  
303 genes compared to sporophyte specific genes could therefore potentially explain the higher polymorphism  
304 levels and higher frequency of deleterious mutations found in pollen-specific genes. In order to control  
305 for this potential bias we compared dN/dS, polymorphism levels and the frequency of deleterious alleles  
306 in pollen-specific genes with a group of 340 genes with expression limited to a single sporophyte cell type  
307 (guard cell, xylem or root hair). To further test for the effect of tissue specificity, these groups were also  
308 compared against 2543 genes which were expressed in at least 5 sporophytic tissues.

309 In this tissue-specificity controlled comparison, dN/dS did not differ between pollen-specific and the  
310 tissue-specific sporophyte gene set. However, dN/dS was significantly higher in pollen-specific genes ( $p =$   
311  $1.7 \times 10^{-27}$ ) and tissue specific sporophyte genes ( $p = 1.0 \times 10^{-9}$ ; fig. 8) compared to broadly expressed  
312 sporophyte-specific genes. In a principal components regression only expression level and GC content had  
313 a significant effect on dN/dS, explaining 8.63% of variation. The PC1 (8.60%) was then mapped against  
314 dN/dS in an ANCOVA on the two levels pollen-specific genes and tissue-specific, sporophytic genes.  
315 dN/dS was significantly higher for pollen genes than tissue-specific, sporophytic genes when controlling  
316 for PC1 ( $p = 1.4 \times 10^{-3}$ ; figure 9).

317 Similarly,  $\pi_n$  and  $\theta_n$  did not differ between pollen-specific and the tissue-specific sporophyte gene set.  
318 However, they were both significantly higher in pollen-specific genes ( $p = 1.6 \times 10^{-30}$  &  $8.4 \times 10^{-75}$ ,  
319 respectively) and tissue specific sporophyte genes ( $p = 7.1 \times 10^{-13}$  &  $2.7 \times 10^{-26}$ ; fig. 10) compared  
320 to broadly expressed sporophyte-specific genes. In a principal components regression, expression level  
321 and GC content had a significant effect on  $\pi_n$ , explaining 5.30% of variation. The first PC (5.06%)  
322 was plotted against  $\pi_n$  in an ANCOVA within pollen-specific and tissue-specific sporophytic genes.  $\pi_n$   
323 was significantly higher for pollen-specific genes compared to tissue-specific, sporophytic genes when  
324 controlling for PC1 ( $p = 6.5 \times 10^{-3}$ ; figure 11(a)). In a similar analysis for  $\theta_n$ , all 6 parameters (expression  
325 level, GC content, codon bias variance, gene length, average intron length and gene density) significantly  
326 contributed to 18.82% of variation. The second PC was largest (9.55%) and was plotted against  $\theta_n$  in  
327 an ANCOVA (figure 11(b)). When controlling for PC2  $\theta_n$  was significantly higher within pollen-specific  
328 genes ( $p = 2.9 \times 10^{-7}$ ) compared to tissue-specific, sporophytic genes.

329 Premature stop codons remained significantly more frequent in pollen-specific genes than in sporo-  
330 phytic, tissue specific genes ( $p = 0.033$ ), and broadly expressed, sporophytic genes ( $p = 3.0 \times 10^{-14}$ ; fig.  
331 12). Premature stop codons were more frequent in tissue specific, sporophytic tissues (mean  $0.057 \pm$   
332  $6.9 \times 10^{-3}$ ) compared to broadly expressed sporophytic genes ( $0.051 \pm 3.2 \times 10^{-3}$ ) but not significantly.  
333 There was no significant difference in the frequency of frameshift mutations between pollen-specific genes

334 and tissue-specific, sporophytic genes but the frequency was significantly higher in both groups compared  
335 to broadly expressed, sporophytic genes ( $p = 2.0 \times 10^{-34}$  &  $1.7 \times 10^{-14}$ ; figure 12). GC content, codon  
336 bias variance, gene length, average intron length and gene density had a significant effect on 19.03%  
337 variation in the frequency of stop codons. The first PC was largest (16.44%) and was implemented in  
338 an ANCOVA as the continuous variable (fig. 13(a)). Due to a significant interaction between the two  
339 groups, pollen-specific genes and tissue-specific, sporophytic genes, differences in stop codon frequencies  
340 were measured within 5 equal bins along the PC1 axis. The frequency of stop codon mutations did not  
341 differ significantly within the first four quantiles but was significantly higher within pollen-specific genes  
342 in the fifth quantile ( $PC1 > 1.14$ ;  $p = 5.7 \times 10^{-5}$ ). The analysis was repeated for the frequency of  
343 frameshift mutations. Expression level, GC content, codon bias variance and gene length explained a  
344 total of 6.35% variation. PC2 was largest with 3.24% so was implemented in an ANCOVA. The frequency  
345 of frameshift mutations was significantly higher within pollen-specific genes compared to tissue-specific,  
346 sporophytic genes when controlling for PC2 ( $p = 0.017$ ; figure 13(b)).

## 347 Discussion

348 Our analysis showed that protein divergence, polymorphism levels and the frequency of deleterious muta-  
349 tions were significantly higher within pollen-specific genes compared to sporophyte-specific genes. These  
350 differences remained when controlling for expression level, GC content, codon bias variance, gene length,  
351 average intron length and gene density.

### 352 *Evolutionary rates higher within pollen-specific genes*

353 Protein divergence rates (dN/dS) were on average 37% higher in pollen-specific genes compared to  
354 sporophyte-specific genes. This is comparable to the findings presented by Szövényi *et al.* (2013), who  
355 found dN/dS to be 39% or 81% higher in pollen genes for *A. thaliana* depending on the data set. In a  
356 further paper, no difference in dN/dS could be found between pollen-specific and non-reproductive genes  
357 for *A. thaliana* (Gossmann *et al.*, 2013). This discrepancy was most likely caused by the method of gene  
358 selection. In the Szövényi *et al.* (2013) study, as in the current study, genes with exclusive expression  
359 within sporophytic or pollen tissues were analysed. In the Gossmann *et al.* (2013) paper, on the other  
360 hand, genes were selected more inclusively, labelling a gene as pollen-enriched if expression was signifi-  
361 cantly higher at a fold change greater than 4 within different comparisons. This means that at least some  
362 of the sporophyte genes discussed in the Gossmann *et al.* (2013) study will also be expressed to some  
363 extent within pollen tissues and are therefore exposed to haploid selection. Even a low level of expression  
364 in haploid tissues may be sufficient to counteract the effect of masking, which would explain the lack of  
365 difference in evolutionary rates detected. It appears then that the genes, which are exclusively expressed  
366 in pollen or sporophytic tissues, may be causing the significantly different dN/dS rates we observe here.

367 These higher dN/dS values can, in part, be explained by stronger positive selection acting on pollen-  
368 specific genes compared to sporophyte specific genes, as indicated by a greater proportion of pollen-specific  
369 genes containing sites under positive selection (15.2% compared to 9.3%). However, an analysis of the  
370 distribution of fitness effects of new nonsynonymous mutations revealed a higher frequency of effectively  
371 neutral mutations within pollen-specific genes. This indicates purifying selection is more relaxed within  
372 pollen-specific genes, suggesting the higher dN/dS rate within pollen-specific genes may have been caused  
373 by a greater proportion of slightly deleterious substitutions due to random drift.

#### 374 *Polymorphism levels suggest relaxed selection on pollen-specific genes*

375 Polymorphism levels were significantly higher within pollen-specific genes. Both Watterson's  $\theta$  and  $\pi$   
376 of non-synonymous sites remained significantly higher within pollen-specific genes when controlling for  
377 expression and five further genomic differences (GC content, codon bias variance, gene length, average  
378 intron length and gene density). In one of two recent studies, higher polymorphism rates were also  
379 found in pollen-specific genes for *A. thaliana* (Szövényi *et al.*, 2013). In the second study, however,  
380 no difference was found between pollen-specific genes in general and random, non-reproductive genes  
381 in terms of nucleotide diversity (Gossmann *et al.*, 2013), which, as discussed in the previous section, is  
382 possibly due to the more inclusive choice of genes in that study.

383 We also found significantly higher levels of putatively deleterious alleles (premature stop codons and  
384 frameshift mutations) within pollen-specific genes. This supports the conclusions of Szövényi *et al.*  
385 (2013) that the raised polymorphism levels indicate relaxed purifying selection on pollen-specific genes.  
386 In other words, comparatively weaker selective constraints are allowing deleterious alleles to accumulate  
387 at a greater rate within pollen-specific genes compared to those whose expression is restricted to the  
388 sporophyte.

#### 389 *Has there been a recent shift in selection strength?*

390 The patterns in our data are compatible with a change in selection efficacy that is likely to have taken place  
391 since the speciation of *A. thaliana* and *A. lyrata*. The relatively recent switch from self-incompatibility  
392 to self-compatibility in *A. thaliana* (ca. 1MYA; Tang *et al.* 2007) explains why we have observed evi-  
393 dence for relaxed selection in polymorphism levels but stronger positive selection in divergence data for  
394 pollen-specific genes. The divergence data used to calculate dN/dS mainly represent a prolonged period  
395 of outcrossing ( $\sim 12$  MYA), since the speciation of *A. thaliana* from *A. lyrata* occurred roughly 13 million  
396 years ago (Beilstein *et al.*, 2010). In contrast, the polymorphism data and frequencies of putative dele-  
397 terious alleles reflect the recent selective effects of high selfing rates. This may also explain why slightly  
398 more relaxed purifying selection was discovered for pollen-specific genes by the DoFE analysis, since it  
399 also relies on polymorphism data.

400 The evidence we have found for a more recent weaker selection on pollen-specific genes contrasts with  
401 findings for the outcrossing *Capsella grandiflora* (Arunkumar *et al.*, 2013). In that study the more efficient  
402 purifying and adaptive selection on pollen genes was linked to two possible factors: haploid expression  
403 and pollen competition. *A. thaliana* is a highly self-fertilizing species with selfing rates generally in the  
404 range of 95 - 99% (Platt *et al.*, 2010), so haploid expression is unlikely to improve the efficacy of selection  
405 on pollen-specific genes relative to sporophyte genes. This is because most individuals found in natural  
406 populations are homozygous for the majority of loci, reducing the likelihood that deleterious alleles are  
407 masked in heterozygous state when expressed in a diploid tissue (Platt *et al.*, 2010). A reduction in pollen  
408 competition can also be expected due to the probably limited number of pollen genotypes in highly selfing  
409 populations (Charlesworth and Charlesworth, 1992; Mazer *et al.*, 2010). However, outcrossing does occur  
410 in natural *A. thaliana* populations with one study reporting an effective outcrossing rate in one German  
411 population of 14.5% (Bomblies *et al.*, 2010). Nevertheless, it appears that these generally rare outcrossing  
412 events may not be sufficient to prevent a reduction in pollen competition for *A. thaliana*.

413 So if we assume both masking and pollen competition are negligible forces when comparing selection  
414 on pollen-specific genes to sporophyte-specific genes, why is selection more relaxed on pollen-specific  
415 genes than sporophyte-specific genes rather than similar?

416 We have shown here that tissue specificity partly explains why selection is more relaxed on pollen  
417 genes. The full set of sporophyte-specific genes contains genes expressed across several tissues, and  
418 broadly expressed genes have been known to be under more efficient selection than tissue-specific genes  
419 due to their exposure to a higher number of selective constraints (Duret and Mouchiroud, 2000; Liao  
420 *et al.*, 2006; Slotte *et al.*, 2011). Both pollen-specific genes and genes limited to one of three sporophytic  
421 tissues (xylem, guard cell or root hair) showed raised levels of dN/dS, polymorphism and frequency of  
422 deleterious mutations compared to broadly expressed sporophyte-specific genes (expressed in at least 5  
423 tissues). Tissue specificity appeared to explain, to a certain extent, the reduced selection efficacy in  
424 pollen-specific genes as there was no longer a significant difference in polymorphism levels ( $\theta_n$  and  $\pi_n$ ) or  
425 the frequency of frameshift mutations in pollen-specific genes compared to the tissue specific, sporophytic  
426 genes (the frequency of stop codon mutations remained significantly higher). However, tissue specificity  
427 alone only partly explains the apparent, current more relaxed selection on pollen-specific genes. Once  
428 further genomic features (expression level, GC content, codon bias variance, gene length, average intron  
429 length, gene density) were controlled for, all measures remained higher in pollen-specific genes even when  
430 compared to genes restricted to only one sporophytic tissue except for stop codon frequency.

431 The difference in rates of protein evolution between pollen-specific and sporophyte-specific genes could  
432 also be explained to a large extent by tissue specificity. As with polymorphism level and frequencies of  
433 deleterious mutations, dN/dS did not differ between pollen-specific and tissue specific, sporophytic genes.  
434 However, dN/dS was significantly higher in both gene groups compared to broadly expressed, sporophytic

435 genes. This suggests that the specificity of pollen genes to a small set of tissues is responsible for their  
436 elevated rates of protein evolution rather than their specific association with pollen tissues. Again, this  
437 only partially explains the raised dN/dS levels, as when controlling for differences in expression level and  
438 GC content, dN/dS remained significantly higher within pollen-specific genes.

439 Previously reported similar findings indicating relaxed purifying selection in pollen specific genes in  
440 *A. thaliana* (Szövényi *et al.*, 2013) were explained as possibly resulting from a combination of high tissue  
441 specificity and higher expression noise in pollen compared to sporophytic genes. However, the authors  
442 did not compare selection on pollen genes to tissue specific sporophyte genes to isolate the effect of tissue  
443 specificity. We have shown here that tissue specificity does appear to play a role but does not alone  
444 explain the difference in selection strength between both groups of genes. Higher expression noise could  
445 then be an important factor influencing the level of deleterious alleles which exist for pollen genes in *A.*  
446 *thaliana*.

447 Expression noise has been found to reduce the efficacy of selection substantially and is expected to  
448 be considerably higher for haploid expressed genes (Wang and Zhang, 2011). It is therefore likely that in  
449 the absence of pollen competition and the masking of deleterious sporophyte-specific genes, expression  
450 noise and high tissue specificity become dominant factors for pollen-specific genes of selfing plants. The  
451 loss of self-incompatibility in *A. thaliana* may therefore have led to a reduction in selection efficacy and  
452 the accumulation of deleterious alleles in pollen-specific genes.

### 453 *Conclusion*

454 We have shown that, as in many other taxa, genes expressed in male reproductive tissues evolve at a  
455 quicker rate than somatic genes in *A. thaliana*. The greater divergence of pollen proteins to both *A.*  
456 *lyrata* and *C. rubella* compared to sporophytic genes can be attributed to stronger positive and purifying  
457 selection. However, intra-specific polymorphism data indicate a strong shift in this selection pattern may  
458 have occurred. Since the more recent loss of incompatibility in *A. thaliana* selection appears to have  
459 become more relaxed in pollen-specific genes. This is likely due to a reduction in pollen competition and  
460 the masking of diploid, sporophytic genes as a result of high homozygosity levels. In outcrossing plants,  
461 haploid expression and pollen competition outweigh the negative impact of high tissue specificity and  
462 expression noise on the selection efficacy of pollen-specific genes. In the self-compatible *A. thaliana* high  
463 homozygosity has likely reduced the counteracting effects of pollen competition and haploid expression,  
464 leading to lower selection efficacy and an increased accumulation of deleterious mutations in pollen-specific  
465 compared to sporophyte-specific genes.



## <sup>466</sup> **Acknowledgements**

<sup>467</sup> MCH was supported by a PhD research grant from the Natural Environment Research Council (NERC).

<sup>468</sup> DT would like to acknowledge financial support from the UK Biotechnology and Biological Science

<sup>469</sup> Research Council (BBSRC).

## 470 References

- 471 Altschul, S. F., Madden, T. L., Schäffer, A. A., Zhang, J., Zhang, Z., Miller, W., and Lipman, D. J. 1997.  
472 Gapped BLAST and PSI-BLAST: a new generation of protein database search programs. *Nucleic*  
473 *Acids Research*, 25(17): 3389–3402.
- 474 Anisimova, M., Nielsen, R., and Yang, Z. 2003. Effect of Recombination on the Accuracy of the Likelihood  
475 Method for Detecting Positive Selection at Amino Acid Sites. *Genetics*, 164(3): 1229–1236.
- 476 Arunkumar, R., Josephs, E. B., Williamson, R. J., and Wright, S. I. 2013. Pollen-Specific, but Not  
477 Sperm-Specific, Genes Show Stronger Purifying Selection and Higher Rates of Positive Selection Than  
478 Sporophytic Genes in *Capsella grandiflora*. *Molecular Biology and Evolution*, 30(11): 2475–2486.
- 479 Beilstein, M. A., Nagalingum, N. S., Clements, M. D., Manchester, S. R., and Mathews, S. 2010. Dated  
480 molecular phylogenies indicate a Miocene origin for *Arabidopsis thaliana*. *Proceedings of the National*  
481 *Academy of Sciences*, 107(43): 18724–18728.
- 482 Bomblies, K., Yant, L., Laitinen, R. A., Kim, S.-T., Hollister, J. D., Warthmann, N., Fitz, J., and Weigel,  
483 D. 2010. Local-Scale Patterns of Genetic Variability, Outcrossing, and Spatial Structure in Natural  
484 Stands of *Arabidopsis thaliana*. *PLoS Genet*, 6(3): e1000890.
- 485 Borg, M., Brownfield, L., Khatab, H., Sidorova, A., Lingaya, M., and Twell, D. 2011. The R2r3 MYB  
486 Transcription Factor DUO1 Activates a Male Germline-Specific Regulon Essential for Sperm Cell Dif-  
487 ferentiation in *Arabidopsis*. *The Plant Cell Online*, 23(2): 534–549.
- 488 Cao, J., Schneeberger, K., Ossowski, S., Günther, T., Bender, S., Fitz, J., Koenig, D., Lanz, C., Stegle,  
489 O., Lippert, C., Wang, X., Ott, F., Müller, J., Alonso-Blanco, C., Borgwardt, K., Schmid, K. J.,  
490 and Weigel, D. 2011. Whole-genome sequencing of multiple *Arabidopsis thaliana* populations. *Nature*  
491 *Genetics*, 43(10): 956–963.
- 492 Charlesworth, D. and Charlesworth, B. 1992. The Effects of Selection in the Gametophyte Stage on  
493 Mutational Load. *Evolution*, 46(3): 703–720.
- 494 Drummond, D. A., Raval, A., and Wilke, C. O. 2006. A Single Determinant Dominates the Rate of Yeast  
495 Protein Evolution. *Molecular Biology and Evolution*, 23(2): 327–337.
- 496 Duret, L. and Mouchiroud, D. 2000. Determinants of Substitution Rates in Mammalian Genes: Expres-  
497 sion Pattern Affects Selection Intensity but Not Mutation Rate. *Molecular Biology and Evolution*,  
498 17(1): 68–070.
- 499 Edgar, R. C. 2004. MUSCLE: multiple sequence alignment with high accuracy and high throughput.  
500 *Nucleic Acids Research*, 32(5): 1792–1797.
- 501 Eyre-Walker, A. and Keightley, P. D. 2009. Estimating the Rate of Adaptive Molecular Evolution in  
502 the Presence of Slightly Deleterious Mutations and Population Size Change. *Molecular Biology and*  
503 *Evolution*, 26(9): 2097–2108.
- 504 Gan, X., Stegle, O., Behr, J., Steffen, J. G., Drewe, P., Hildebrand, K. L., Lyngsoe, R., Schultheiss, S. J.,  
505 Osborne, E. J., Sreedharan, V. T., Kahles, A., Bohnert, R., Jean, G., Derwent, P., Kersey, P., Belfield,  
506 E. J., Harberd, N. P., Kemen, E., Toomajian, C., Kover, P. X., Clark, R. M., Rättsch, G., and Mott,  
507 R. 2011. Multiple reference genomes and transcriptomes for *Arabidopsis thaliana*. *Nature*, 477(7365):  
508 419–423.
- 509 Gossmann, T. I., Schmid, M. W., Grossniklaus, U., and Schmid, K. J. 2013. Selection-Driven Evolution  
510 of Sex-Biased Genes Is Consistent with Sexual Selection in *Arabidopsis thaliana*. *Molecular Biology*  
511 *and Evolution*, page mst226.
- 512 Jr, F. E. H. and others, w. c. f. C. D. a. m. 2015. Hmisc: Harrell Miscellaneous.
- 513 Kim, S. 2012. ppcor: Partial and Semi-partial (Part) correlation.
- 514 Liao, B.-Y., Scott, N. M., and Zhang, J. 2006. Impacts of Gene Essentiality, Expression Pattern, and  
515 Gene Compactness on the Evolutionary Rate of Mammalian Proteins. *Molecular Biology and Evolution*,  
516 23(11): 2072–2080.

- 517 Mazer, S. J., Hove, A. A., Miller, B. S., and Barbet-Massin, M. 2010. The joint evolution of mating system  
518 and pollen performance: Predictions regarding male gametophytic evolution in selfers vs. outcrossers.  
519 *Perspectives in Plant Ecology, Evolution and Systematics*, 12(1): 31–41.
- 520 McDonald, J. H. and Kreitman, M. 1991. Adaptive protein evolution at the Adh locus in *Drosophila*.  
521 *Nature*, 351(6328): 652–654.
- 522 Mevik, B.-h. and Wehrens, R. 2007. The pls Package: Principal Component and Partial Least Squares  
523 Regression in R. *Journal of Statistical Software*, pages 1–24.
- 524 Nielsen, R. 2005. Molecular Signatures of Natural Selection. *Annual Review of Genetics*, 39(1): 197–218.
- 525 Nordborg, M. 2000. Linkage Disequilibrium, Gene Trees and Selfing: An Ancestral Recombination Graph  
526 With Partial Self-Fertilization. *Genetics*, 154(2): 923–929.
- 527 Paradis, E. 2010. pegas: an R package for population genetics with an integrated-modular approach.  
528 *Bioinformatics*, 26(3): 419–420.
- 529 Perriere, D. C. a. J. R. L. a. A. N. a. L. P. a. S. P. a. G. 2014. seqinr: Biological Sequences Retrieval and  
530 Analysis.
- 531 Pfeifer, B., Wittelsbürger, U., Ramos-Onsins, S. E., and Lercher, M. J. 2014. PopGenome: An Efficient  
532 Swiss Army Knife for Population Genomic Analyses in R. *Molecular Biology and Evolution*, 31(7):  
533 1929–1936.
- 534 Platt, A., Horton, M., Huang, Y. S., Li, Y., Anastasio, A. E., Mulyati, N. W., Ågren, J., Bossdorf, O.,  
535 Byers, D., Donohue, K., Dunning, M., Holub, E. B., Hudson, A., Le Corre, V., Loudet, O., Roux, F.,  
536 Warthmann, N., Weigel, D., Rivero, L., Scholl, R., Nordborg, M., Bergelson, J., and Borevitz, J. O.  
537 2010. The Scale of Population Structure in *Arabidopsis thaliana*. *PLoS Genet*, 6(2): e1000843.
- 538 R Core Team, a. 2012. R: A language and environment for statistical computing.
- 539 Rost, B. 1999. Twilight zone of protein sequence alignments. *Protein Engineering*, 12(2): 85–94.
- 540 Schmitz, R. J., Schultz, M. D., Urich, M. A., Nery, J. R., Pelizzola, M., Libiger, O., Alix, A., McCosh,  
541 R. B., Chen, H., Schork, N. J., and Ecker, J. R. 2013. Patterns of population epigenomic diversity.  
542 *Nature*, 495(7440): 193–198.
- 543 Slotte, T., Bataillon, T., Hansen, T. T., St. Onge, K., Wright, S. I., and Schierup, M. H. 2011. Genomic  
544 Determinants of Protein Evolution and Polymorphism in *Arabidopsis*. *Genome Biology and Evolution*,  
545 3: 1210–1219.
- 546 Smith, N. G. C. and Eyre-Walker, A. 2002. Adaptive protein evolution in *Drosophila*. *Nature*, 415(6875):  
547 1022–1024.
- 548 Suyama, M., Torrents, D., and Bork, P. 2006. PAL2nal: robust conversion of protein sequence alignments  
549 into the corresponding codon alignments. *Nucleic Acids Research*, 34(suppl 2): W609–W612.
- 550 Swanson, W. J. and Vacquier, V. D. 2002. Reproductive Protein Evolution. *Annual Review of Ecology  
551 and Systematics*, 33: 161–179. ArticleType: research-article / Full publication date: 2002 / Copyright  
552 © 2002 Annual Reviews.
- 553 Szövényi, P., Ricca, M., Hock, Z., Shaw, J. A., Shimizu, K. K., and Wagner, A. 2013. Selection is no  
554 more efficient in haploid than in diploid life stages of an angiosperm and a moss. *Molecular Biology  
555 and Evolution*, page mst095.
- 556 Tang, C., Toomajian, C., Sherman-Broyles, S., Plagnol, V., Guo, Y.-L., Hu, T. T., Clark, R. M., Nas-  
557 rallah, J. B., Weigel, D., and Nordborg, M. 2007. The Evolution of Selfing in *Arabidopsis thaliana*.  
558 *Science*, 317(5841): 1070–1072.
- 559 Turner, L. M. and Hoekstra, H. E. 2008. Causes and consequences of the evolution of reproductive  
560 proteins. *The International Journal of Developmental Biology*, 52(5-6): 769–780.
- 561 Wang, Z. and Zhang, J. 2011. Impact of gene expression noise on organismal fitness and the efficacy of  
562 natural selection. *Proceedings of the National Academy of Sciences of the United States of America*,  
563 108(16): E67–E76.

- 564 Wright, S. I., Ness, R. W., Foxe, J. P., and Barrett, S. C. H. 2008. Genomic Consequences of Outcrossing  
565 and Selfing in Plants. *International Journal of Plant Sciences*, 169(1): 105–118.
- 566 Yang, Z. 2007. PAML 4: Phylogenetic Analysis by Maximum Likelihood. *Molecular Biology and Evolu-*  
567 *tion*, 24(8): 1586–1591.
- 568 Yang, Z. and Bielawski, J. P. 2000. Statistical methods for detecting molecular adaptation. *Trends in*  
569 *Ecology & Evolution*, 15(12): 496–503.

570 **Author contributions**

571 All four authors developed the project idea and were involved in the interpretation of data and finalization  
572 of the manuscript. MCH analyzed the data and drafted the manuscript

573 *Figures*

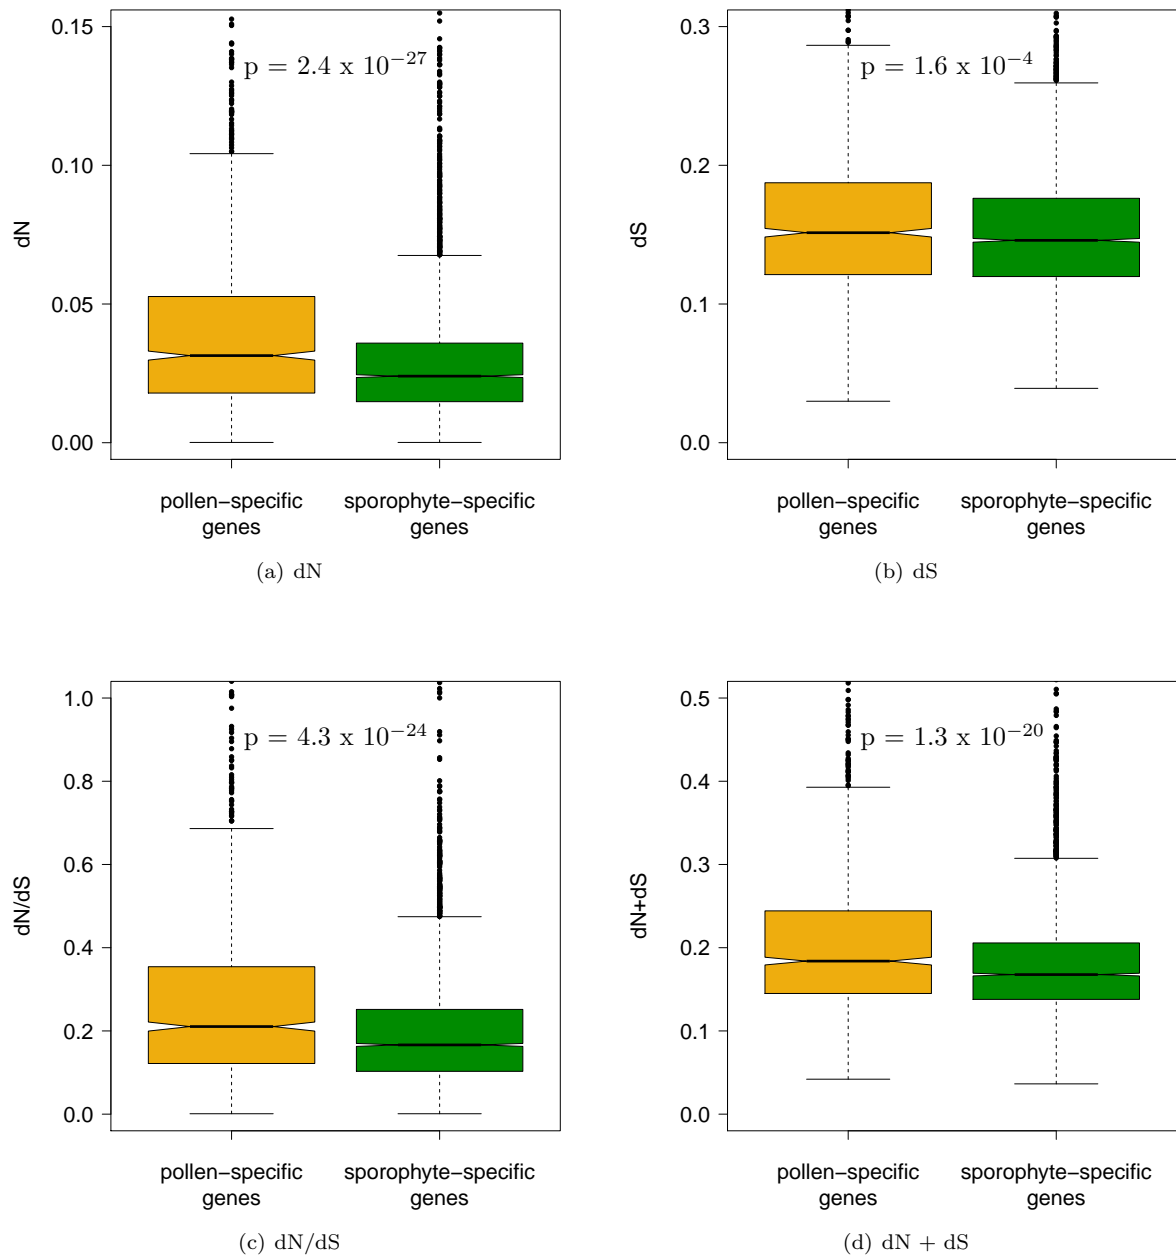

Figure 1: Non-synonymous (dN; a), synonymous (dS; b), dN/dS (c) and total nucleotide substitution rate (dN + dS; d) within pollen-specific and sporophyte-specific genes. Significance tested with Mann Whitney U test.

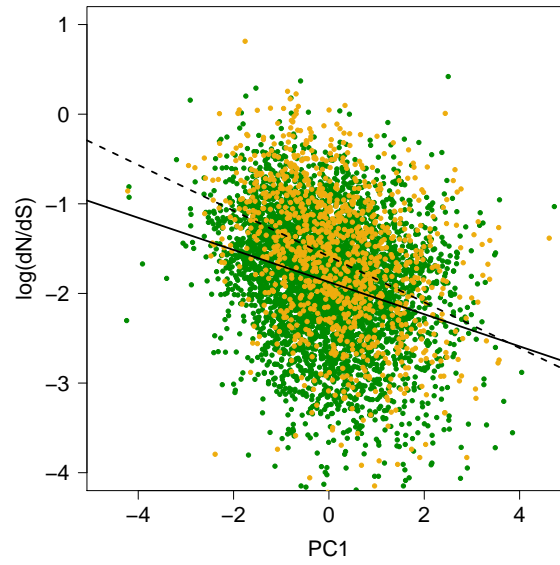

Figure 2: ANCOVA analysis of dN/dS within pollen-specific (yellow points and dashed line) sporophyte-specific genes (green points and solid line) with PC1 (expression and GC content) as the continuous variable .

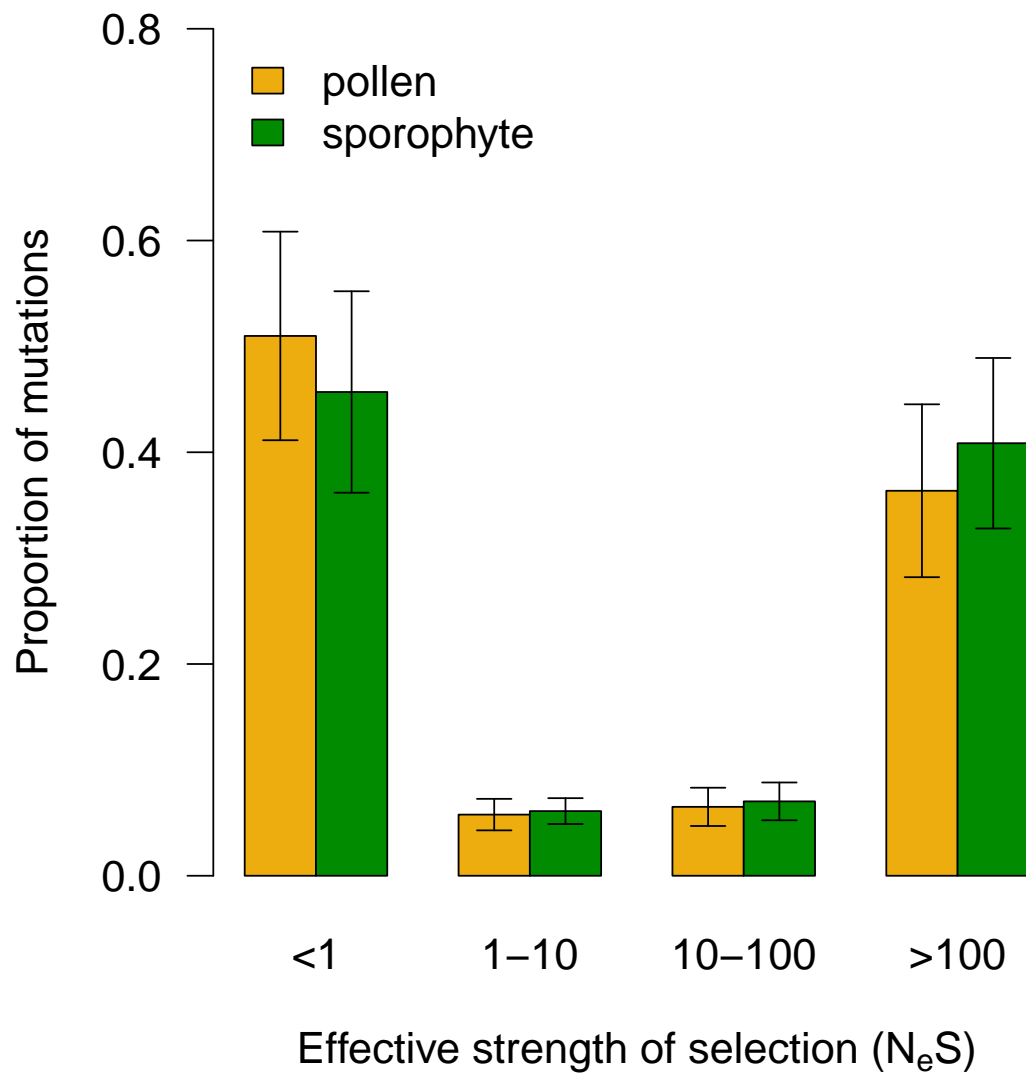

Figure 3: DFE for pollen and sporophyte-specific genes. Shown are the mean proportions of mutations in four  $N_e s$  ranges with SDs



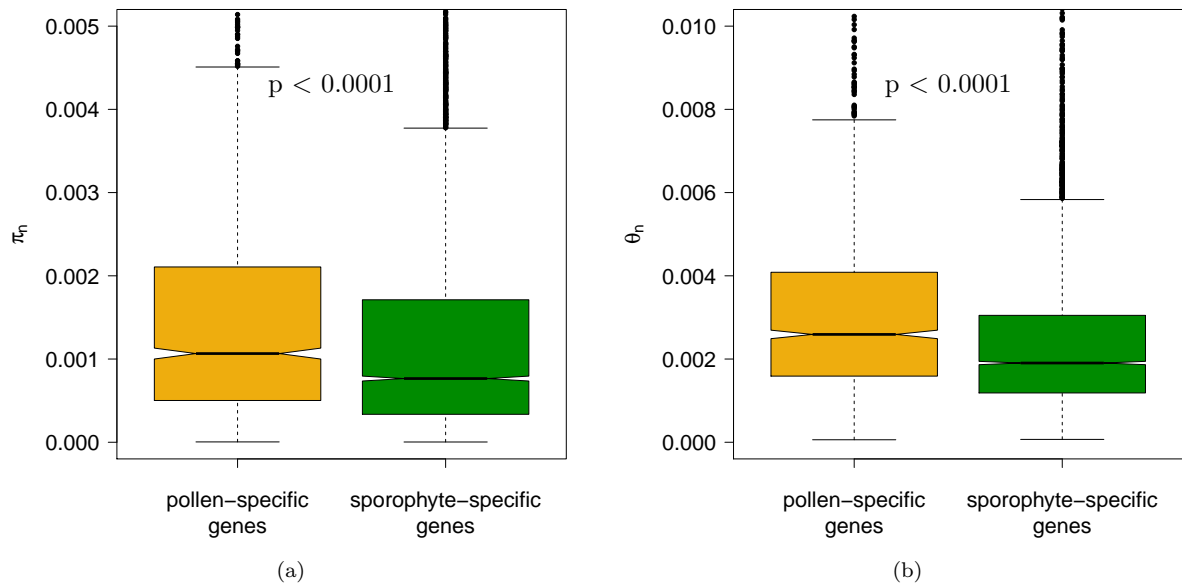

Figure 4: Non-synonymous nucleotide diversity (a) and non-synonymous Watterson's theta (b) within pollen-specific and sporophyte-specific genes. Significance tested with Mann Whitney U test.

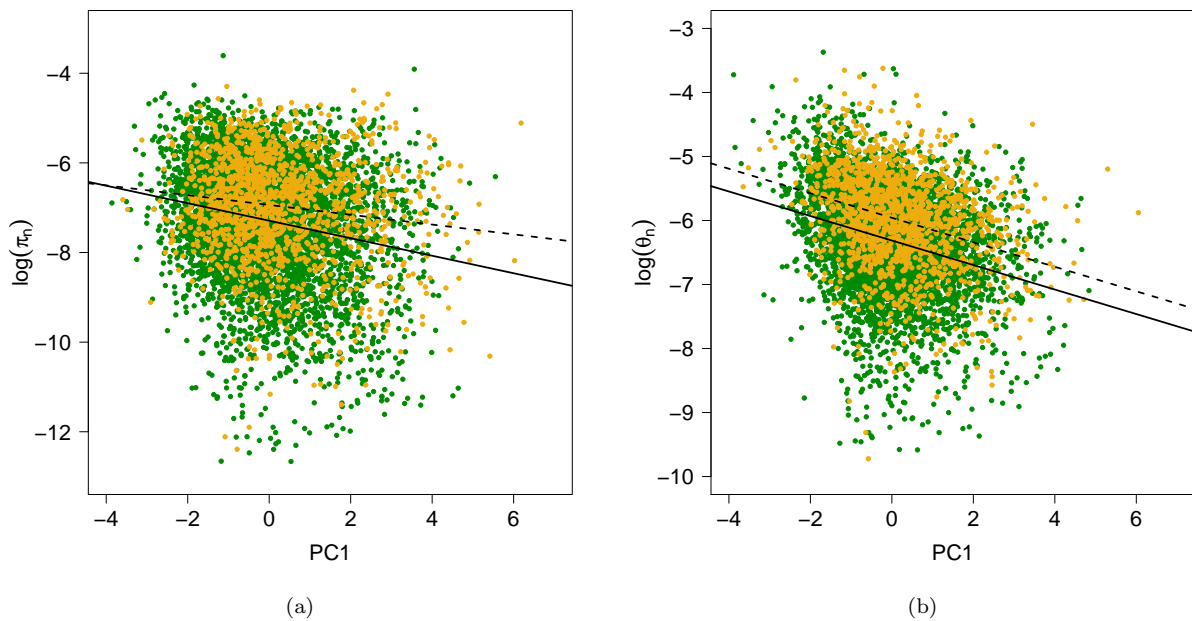

Figure 5: ANCOVA analysis with PC1 (6 genomic variables) as continuous variable reveals both higher  $\pi_n$  (a) and higher  $\theta_n$  (b) among pollen-specific (dark grey points and dashed line) than sporophyte-specific genes (light grey points and solid line).

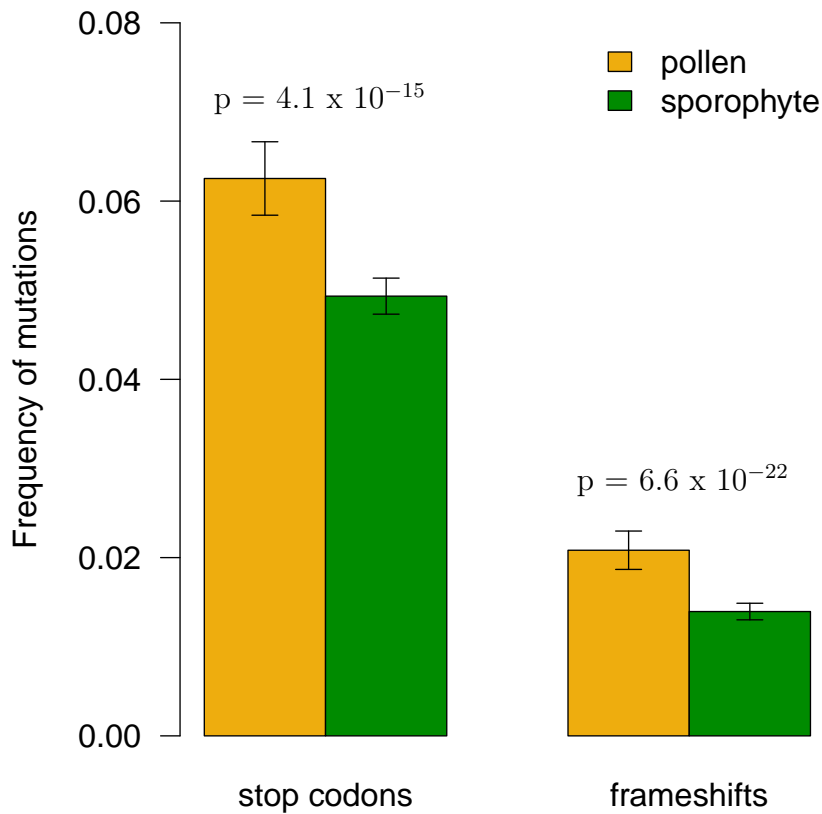

Figure 6: Frequency of alleles containing premature stop codon mutations and frameshift mutations in pollen-specific and sporophyte-specific genes. Significance tested with Mann Whitney U test.

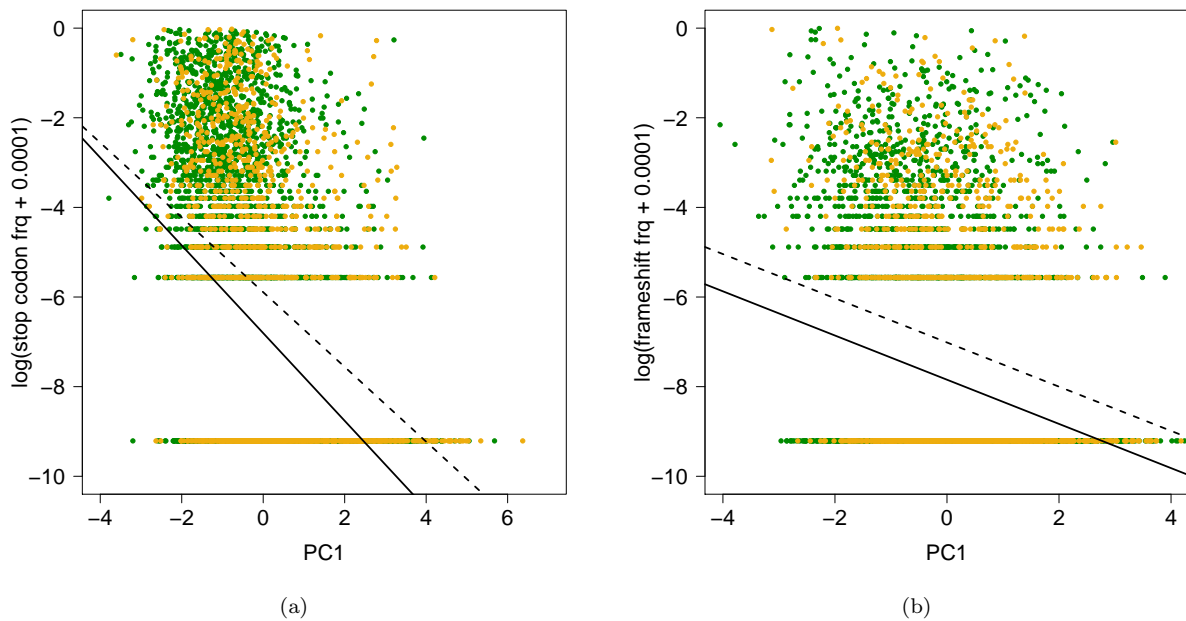

Figure 7: ANCOVA analysis with PC1 (6 genomic variables) as continuous variable reveals significantly higher frequency of stop codon mutations (a) and frameshift mutations (b) among pollen-specific (dark grey points and dashed line) than sporophyte-specific genes (light grey points and solid line).

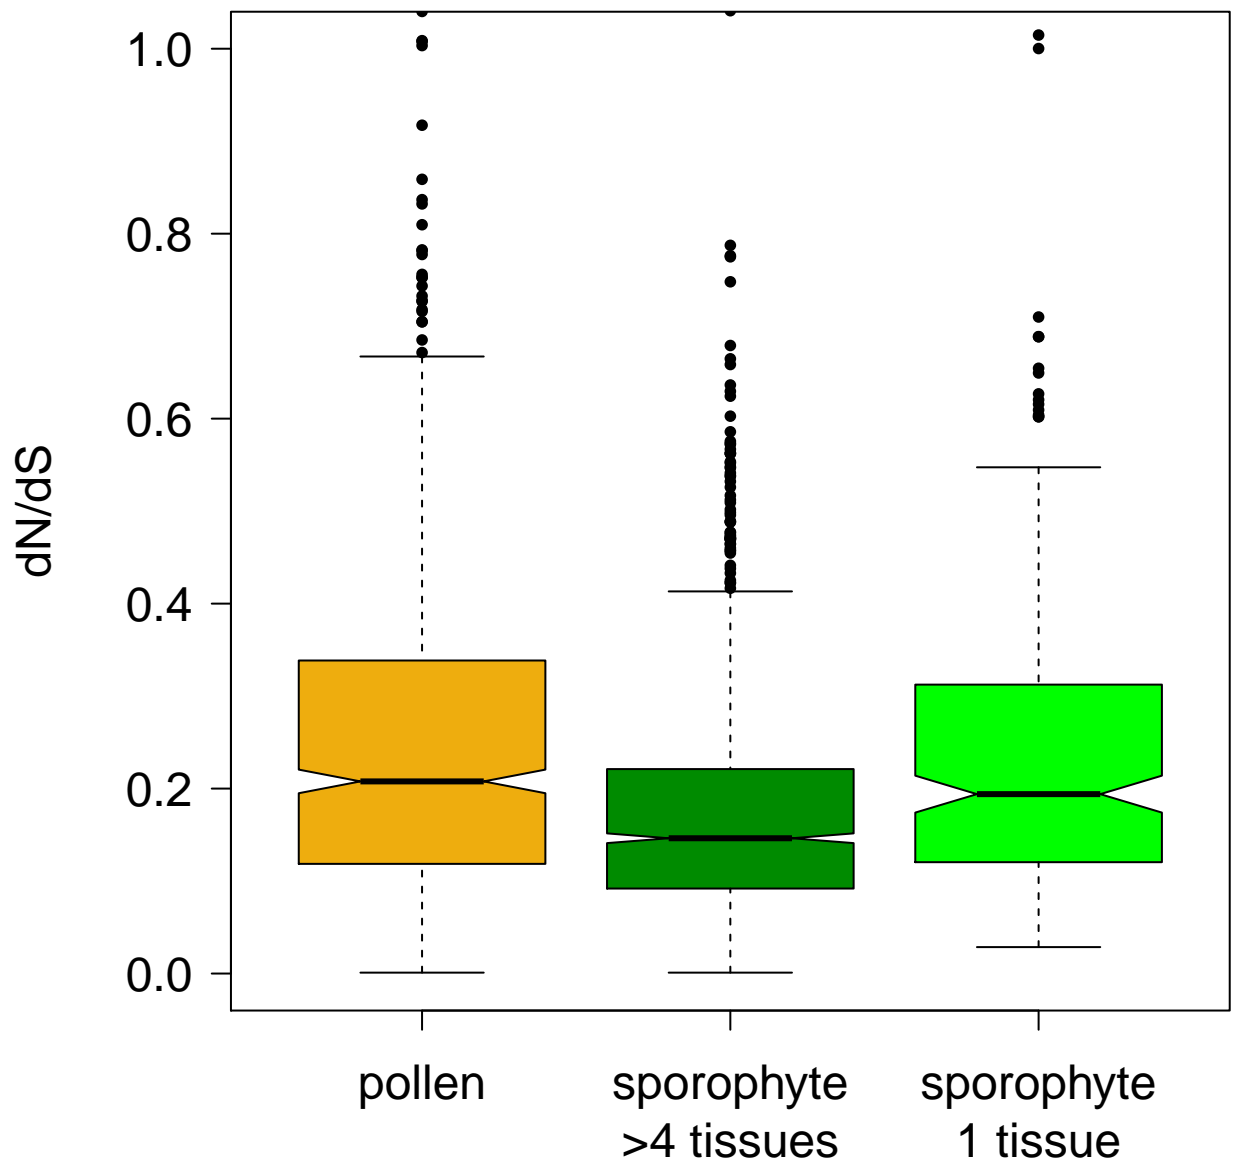

Figure 8: dN/dS within pollen-specific genes, broadly expressed sporophytic genes (at least 5 tissues) and tissue specific genes (expression restricted to guard cell, xylem or root hair tissues).

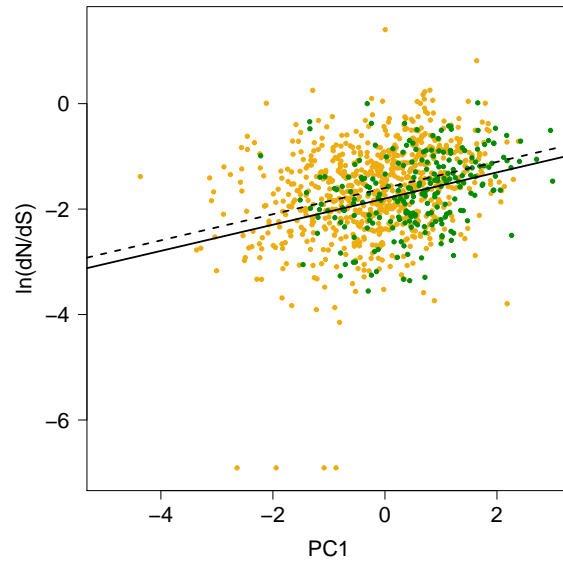

Figure 9: ANCOVA analysis of dN/dS within pollen-specific (yellow points and dashed line) and tissue specific, sporophyte genes (green points and solid line) with PC1 (expression and GC content) as the continuous variable .

574 figure 10

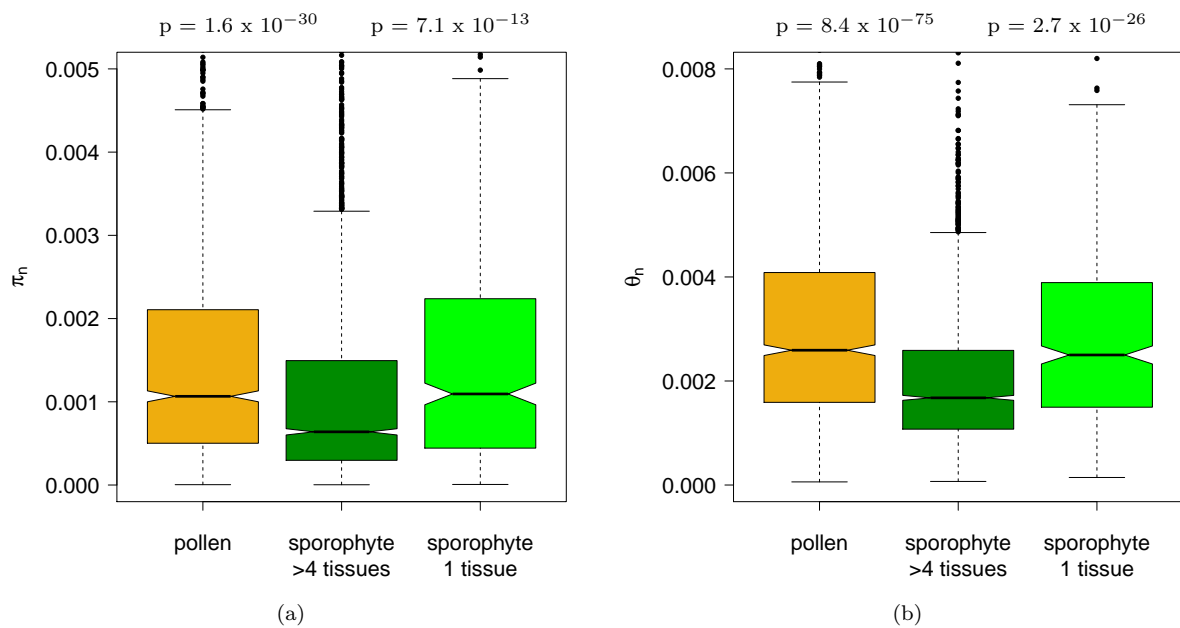

Figure 10: Non-synonymous nucleotide diversity (a) and non-synonymous Watterson's theta (b) within pollen-specific genes, broadly expressed sporophyte-specific genes and genes specific to guard cells, xylem or root hair.

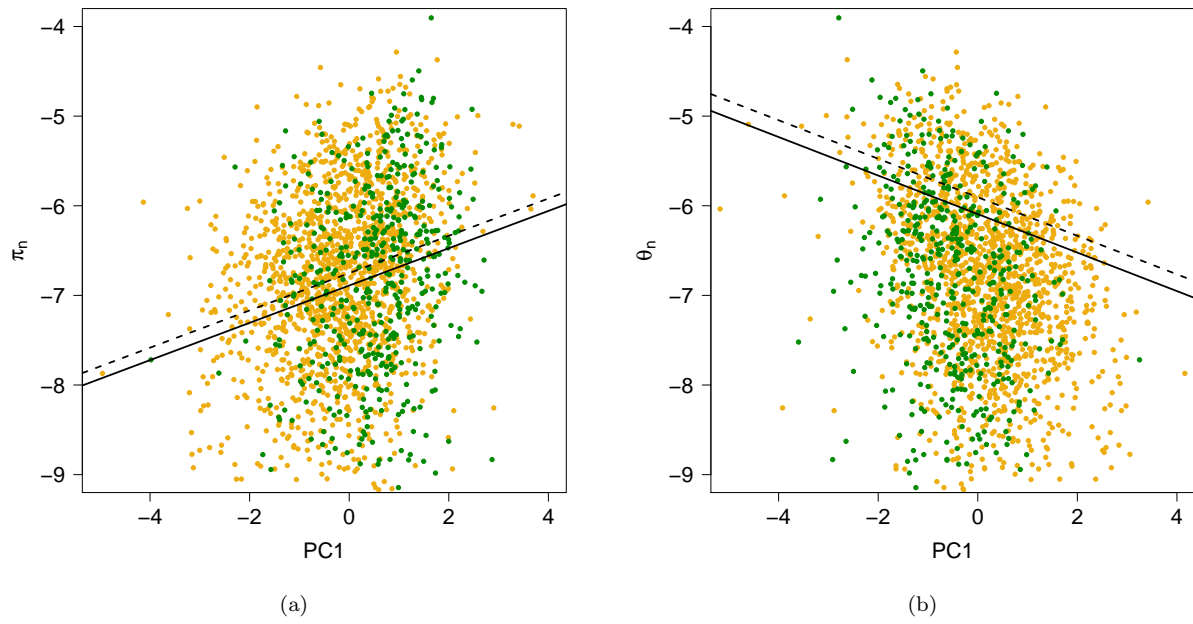

Figure 11: ANCOVAs comparing  $\pi_n$  (a) and  $\theta_n$  (b) within pollen-limited genes (yellow points and dashed line) to tissue-specific, sporophytic genes (green points and solid line) while controlling for the first PC of a PCR.

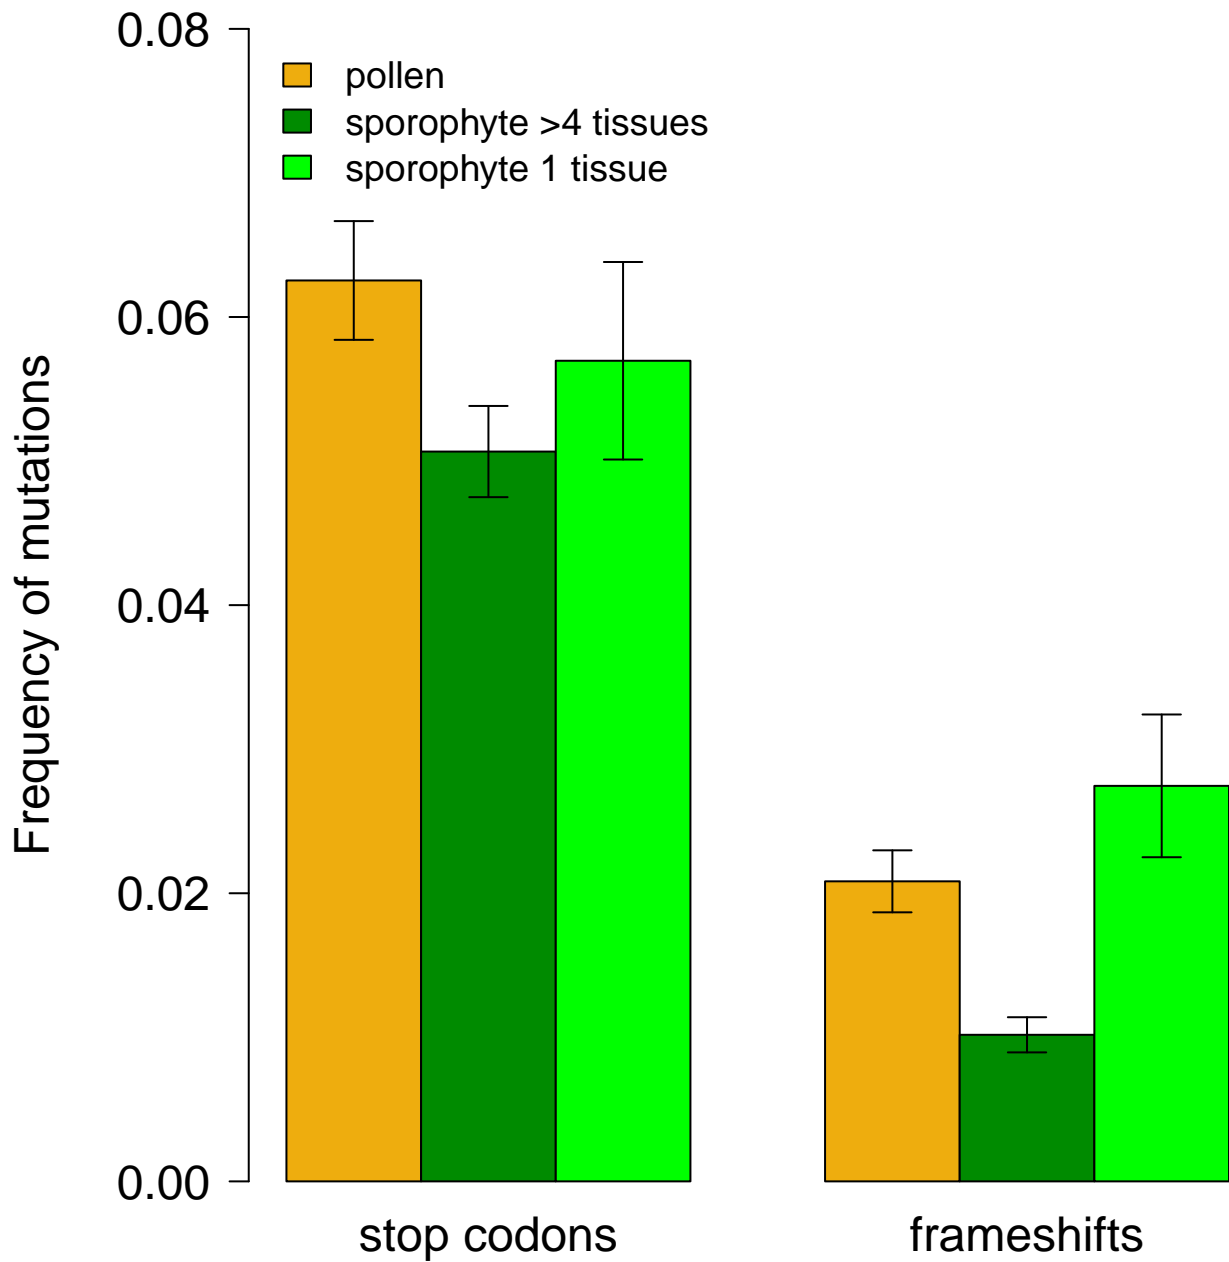

Figure 12: Frequency of stop codon and frameshift mutations within pollen-specific genes, broadly expressed sporophytic genes (at least 5 tissues) and tissue specific genes (expression restricted to guard cell, xylem or root hair tissues).

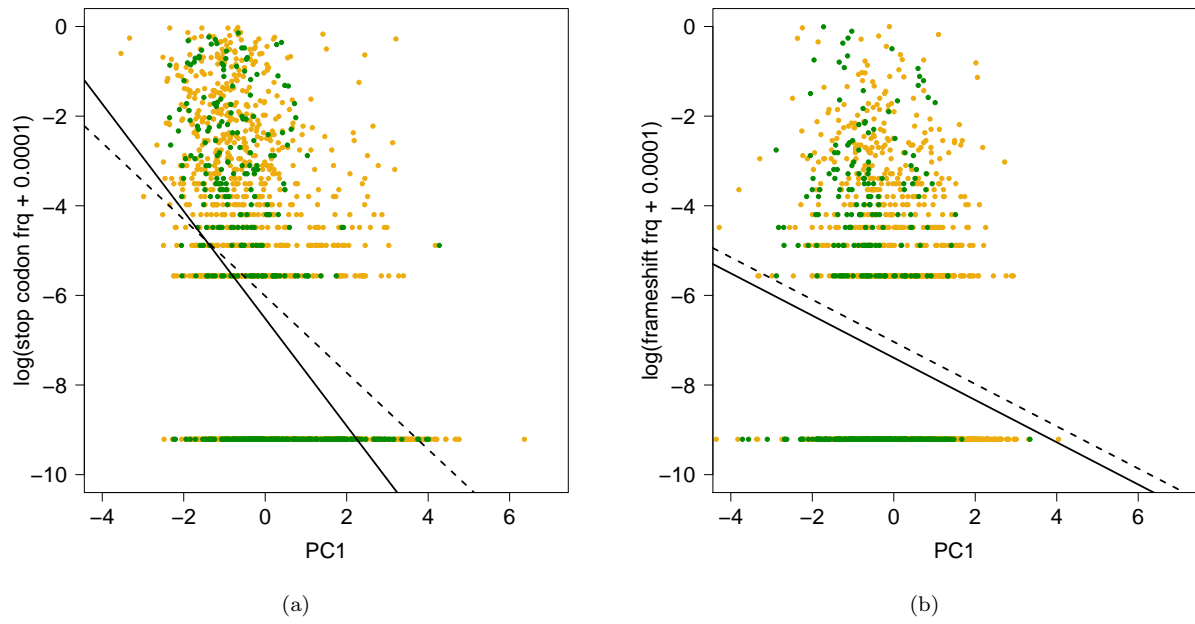

Figure 13: ANCOVAs comparing the frequency of stop codon mutations (a) and frameshift mutations (b) within pollen-limited genes (yellow points and dashed line) to tissue-specific, sporophytic genes (green points and solid line) while controlling for the first PC of a PCR.

Table 1: Chi squared test of the distribution of pollen and sporophyte limited genes among the five nuclear *A. thaliana* chromosomes. Degrees of freedom: 4.

| Chromosome | All genes | Pollen | Sporophyte |
|------------|-----------|--------|------------|
| 1          | 4,348     | 392    | 1,495      |
| 2          | 2,522     | 251    | 862        |
| 3          | 3,326     | 340    | 1,049      |
| 4          | 2,451     | 214    | 839        |
| 5          | 3,888     | 355    | 1,249      |
| $\Sigma$   | 16,535    | 1,552  | 5,494      |
|            | $\chi^2$  | 5.367  | 7.456      |
|            | p         | 0.252  | 0.136      |

Table 2: Comparison of chromosomal positions of pollen and sporophyte genes. Mann Whitney U test.

| Chromosome | W                  | p     |
|------------|--------------------|-------|
| 1          | $2.79 \times 10^5$ | 0.137 |
| 2          | $1.00 \times 10^5$ | 0.071 |
| 3          | $1.72 \times 10^5$ | 0.315 |
| 4          | $8.54 \times 10^4$ | 0.267 |
| 5          | $2.31 \times 10^5$ | 0.241 |

Table 3: Differences in 6 genomic variables between pollen-specific and sporophyte-specific genes. Values are means  $\pm$  standard error of the mean; significance was tested with Mann Whitney U test; p-values are Bonferroni corrected for multiple testing.

| Genomic variable         | Pollen-specific genes |             |   | Sporophyte-specific genes |             | p                     |
|--------------------------|-----------------------|-------------|---|---------------------------|-------------|-----------------------|
| Expression level         | 2,562.30              | $\pm 86.49$ | > | 1,256.21                  | $\pm 23.80$ | $1.2 \times 10^{-63}$ |
| GC content (%)           | 44.20                 | $\pm 0.08$  | < | 45.08                     | $\pm 0.04$  | $1.0 \times 10^{-19}$ |
| Codon bias variance      | 0.46                  | $\pm 0.01$  | = | 0.43                      | $\pm 0.00$  | not significant       |
| gene length              | 1,570.30              | $\pm 24.41$ | < | 1,634.39                  | $\pm 11.62$ | $2.3 \times 10^{-4}$  |
| average intron length    | 124.44                | $\pm 3.23$  | < | 160.08                    | $\pm 2.49$  | $8.6 \times 10^{-10}$ |
| gene density (per 100kb) | 29.99                 | $\pm 0.12$  | > | 29.57                     | $\pm 0.07$  | $1.5 \times 10^{-3}$  |



Table 4: Partial correlations of 6 genomic variables with dN/dS,  $\theta_n$ ,  $\pi_n$ , frequency of premature stop codons and frameshift mutations. Spearman rank correlations controlling for remaining 5 variables; p-values are Bonferroni corrected for multiple testing.

|                          | dN/dS  |     | $\theta_n$ |     | $\pi_n$ |     | stop codons     | frameshifts |        |     |
|--------------------------|--------|-----|------------|-----|---------|-----|-----------------|-------------|--------|-----|
| Expression level         | -0.232 | *** | -0.131     | *** | -0.086  | *** | not significant | -0.090      | ***    |     |
| GC content (%)           | -0.145 | *** | -0.192     | *** | -0.166  | *** | -0.180          | ***         | -0.143 | *** |
| Codon bias variance      | -0.104 | *** | -0.210     | *** | -0.161  | *** | -0.124          | ***         | -0.088 | *** |
| gene length              | -0.108 | *** | 0.325      | *** | 0.181   | *** | 0.136           | ***         | -0.037 | *   |
| average intron length    | -0.061 | *** | -0.191     | *** | -0.123  | *** | 0.084           | ***         | -0.109 | *** |
| gene density (per 100kb) | 0.039  | *   | -0.137     | *** | -0.116  | *** | -0.054          | ***         | -0.029 | *   |

\*p<0.01; \*\*p<10<sup>-6</sup>; \*\*\*p<10<sup>-9</sup>

Table 5: dN/dS within 5 equal bins along the PC1 axis. Shown are medians (means).

|            | < 20%                  |         | 20% - 40%              |         | 40% - 60%              |         | 60% - 80% |         | > 80%           |         |
|------------|------------------------|---------|------------------------|---------|------------------------|---------|-----------|---------|-----------------|---------|
| Pollen     | 0.269                  | (0.347) | 0.249                  | (0.346) | 0.210                  | (0.276) | 0.173     | (0.214) | 0.144           | (0.198) |
| Sporophyte | 0.220                  | (0.247) | 0.173                  | (0.199) | 0.160                  | (0.183) | 0.146     | (0.192) | 0.132           | (0.160) |
| p          | 3.7 x 10 <sup>-5</sup> |         | 1.4 x 10 <sup>-9</sup> |         | 1.6 x 10 <sup>-6</sup> |         | 0.050     |         | non-significant |         |

Table 6: dN/dS between *A. thaliana*, *A. lyrata* and *C. rubella*. Values are means (and medians); significance was tested with Mann Whitney U test; p-values are Bonferroni corrected for multiple testing.

|                                          | Pollen          | Sporophyte      | p value                 |
|------------------------------------------|-----------------|-----------------|-------------------------|
| <i>A. thaliana</i> vs. <i>A. lyrata</i>  | 0.2689 (0.2106) | 0.1963 (0.1664) | 4.3 x 10 <sup>-24</sup> |
| <i>A. thaliana</i> vs. <i>C. rubella</i> | 0.2409 (0.2036) | 0.1801 (0.1567) | 8.8 x 10 <sup>-22</sup> |
| <i>A. lyrata</i> vs. <i>C. rubella</i>   | 0.2370 (0.1945) | 0.1818 (0.1568) | 1.3 x 10 <sup>-15</sup> |

Table 7: Nonsynonymous pi within 5 equal bins along the PC1 axis. Shown are medians (means).

|            | < 20%                |                         | 20% - 40%            |                         | 40% - 60%            |                         | 60% - 80%            |                         | > 80%                |                         |
|------------|----------------------|-------------------------|----------------------|-------------------------|----------------------|-------------------------|----------------------|-------------------------|----------------------|-------------------------|
| Pollen     | 1.0x10 <sup>-3</sup> | (1.7x10 <sup>-3</sup> ) | 1.1x10 <sup>-3</sup> | (1.7x10 <sup>-3</sup> ) | 1.1x10 <sup>-3</sup> | (1.7x10 <sup>-3</sup> ) | 1.1x10 <sup>-3</sup> | (1.6x10 <sup>-3</sup> ) | 8.4x10 <sup>-4</sup> | (1.5x10 <sup>-3</sup> ) |
| Sporophyte | 1.0x10 <sup>-3</sup> | (1.7x10 <sup>-3</sup> ) | 8.6x10 <sup>-4</sup> | (1.4x10 <sup>-3</sup> ) | 7.2x10 <sup>-4</sup> | (1.2x10 <sup>-3</sup> ) | 6.7x10 <sup>-4</sup> | (1.1x10 <sup>-3</sup> ) | 6.0x10 <sup>-4</sup> | (1.0x10 <sup>-3</sup> ) |
| p          | ns                   |                         | 1.1x10 <sup>-3</sup> |                         | 1.1x10 <sup>-8</sup> |                         | 5.8x10 <sup>-6</sup> |                         | 1.0x10 <sup>-5</sup> |                         |

Table 8: Frequency of stop codons within 5 equal bins along the PC1 axis. Shown are medians (means).

|            | < 20%           |         | 20% - 40%              |         | 40% - 60%              |         | 60% - 80%              |         | > 80%                   |         |
|------------|-----------------|---------|------------------------|---------|------------------------|---------|------------------------|---------|-------------------------|---------|
| Pollen     | 0.028           | (0.113) | 0.011                  | (0.111) | 0.004                  | (0.056) | 0                      | (0.033) | 0                       | (0.015) |
| Sporophyte | 0.015           | (0.106) | 0.004                  | (0.063) | 0                      | (0.045) | 0                      | (0.022) | 0                       | (0.006) |
| p          | non significant |         | 5.7 x 10 <sup>-6</sup> |         | 1.1 x 10 <sup>-5</sup> |         | 6.3 x 10 <sup>-8</sup> |         | 8.3 x 10 <sup>-11</sup> |         |

Table 9: Differences in 6 genomic variables between pollen-specific genes and genes limited to one of three sporophytic tissues. Values are means  $\pm$  standard error of the mean; significance was tested with Mann Whitney U test; p-values are Bonferroni corrected for multiple testing.

|                          | Pollen-specific genes |             |   | guard cell, xylem or root hair |             | p                       |
|--------------------------|-----------------------|-------------|---|--------------------------------|-------------|-------------------------|
| Expression level         | 2,562.30              | $\pm$ 86.49 | > | 446.24                         | $\pm$ 26.82 | 1.0 x 10 <sup>-77</sup> |
| GC content (%)           | 44.20                 | $\pm$ 0.08  | < | 44.80                          | $\pm$ 0.17  | 4.5 x 10 <sup>-3</sup>  |
| Codon bias variance      | 0.46                  | $\pm$ 0.01  | > | 0.39                           | $\pm$ 0.01  | 2.2 x 10 <sup>-6</sup>  |
| gene length              | 1,570.30              | $\pm$ 24.41 | = | 1,561.71                       | $\pm$ 36.20 | not significant         |
| average intron length    | 124.44                | $\pm$ 3.23  | = | 152.49                         | $\pm$ 9.14  | not significant         |
| gene density (per 100kb) | 29.99                 | $\pm$ 0.12  | = | 29.48                          | $\pm$ 0.30  | not significant         |

Table 10: Expression data sets.

|         | Dataset                   | Description            | Chips | Original source                      |
|---------|---------------------------|------------------------|-------|--------------------------------------|
| Haploid | UNM                       | Uninucleate microspore | 2     | Honys & Twell, 2004                  |
|         | BCP                       | Bicellular pollen      | 2     | Honys & Twell, 2004                  |
|         | TCP                       | Tricellular Pollen     | 2     | Honys & Twell, 2004                  |
|         | MPG                       | Mature Pollen          | 2     | Honys & Twell, 2004                  |
|         | GP*                       | Pollen Tube Grouped    | 6     | Qin et al., 2009 ; Wang et al., 2008 |
|         | PT4*                      | Pollen Tube Grouped    | 6     | Qin et al., 2009 ; Wang et al., 2008 |
|         | SPC                       | Sperm Cell             | 3     | Borges et al., 2008                  |
| Diploid | SL                        | Silique                | 30    | NASC                                 |
|         | LF                        | Leaves                 | 36    | NASC                                 |
|         | GC                        | Guard Cell             | 3     | NASC                                 |
|         | PT**                      | Petiole                | 3     | NASC                                 |
|         | ST                        | Stems                  | 2     | NASC                                 |
|         | HP                        | Hypocotyl              | 8     | NASC                                 |
|         | XL                        | Xylem                  | 3     | NASC                                 |
|         | CR                        | Cork                   | 3     | NASC                                 |
|         | RT                        | Roots                  | 11    | NASC                                 |
| RH      | Root hair elongation zone | 3                      | NASC  |                                      |

NASC: Nottingham Arabidopsis Stock Centre.

\* GP and PT4 were combined to one data set called PT, selecting the highest expression level of the two for each gene.

\*\* Renamed PET
